# Supplementary material
Source: PubMed Central journal article supplement (PMC8135065)
Supplement: jama-e217872-s001.pdf [file jama-e217872-s001.pdf]

## Supplemental Online Content

Kim LHY, Saleh C, Whalen-Browne A, O'Byrne PM, Chu DK. Triple vs dual inhaler therapy and asthma outcomes in moderate-to-severe asthma: a systematic review and meta-analysis. *JAMA*. doi:10.1001/jama.2021.7872

- eMethods 1.** Search Strategies
- eMethods 2.** Additional Methods Details
- eMethods 3.** PRISMA Checklist
- eTable 1.** Summary of Findings
- eTable 2.** Inclusion/exclusion Criteria
- eTable 3.** Subgroup and Sensitivity Analyses
- eFigure 1.** Assessment of Risk of Bias Using Cochrane Collaboration Tool
- eFigure 2.** Funnel Plots
- eFigure 3.** Pooled Reported Hazard Ratios
- eFigure 4.** Asthma Worsening
- eFigure 5.** Serious and Non-serious Adverse Events
- eFigure 6.** All-cause Mortality – Frequentist Analysis
- eFigure 7.** Components of Adverse Events
- eFigure 8.** Trial Sequential Analyses

This supplemental material has been provided by the authors to give readers additional information about their work.

eMethods 1. Search Strategies – Inception to Dec 8<sup>th</sup>, 2020 for all databases

| <b>MEDLINE and HEALTHSTAR</b>                                                                                                                              |                                                                        |
|------------------------------------------------------------------------------------------------------------------------------------------------------------|------------------------------------------------------------------------|
| <b>Database: OVID Medline Epub Ahead of Print, In-Process &amp; Other Non-Indexed Citations, Ovid MEDLINE(R) Daily and Ovid MEDLINE(R) 1946 to Present</b> |                                                                        |
| <b>Search Strategy:</b>                                                                                                                                    |                                                                        |
| 1                                                                                                                                                          | exp Asthma/ or asthma.mp. (178618)                                     |
| 2                                                                                                                                                          | wheez\$.mp. (14006)                                                    |
| 3                                                                                                                                                          | exp Bronchial Spasm/ (4314)                                            |
| 4                                                                                                                                                          | bronchospas\$.mp. (5504)                                               |
| 5                                                                                                                                                          | exp Bronchoconstriction/ (4157)                                        |
| 6                                                                                                                                                          | reactive airway disease.mp. (338)                                      |
| 7                                                                                                                                                          | bronchoconstrict\$.mp. (11556)                                         |
| 8                                                                                                                                                          | 1 or 2 or 3 or 4 or 5 or 6 or 7 (192730)                               |
| 9                                                                                                                                                          | long acting muscarinic antagonist.mp. (531)                            |
| 10                                                                                                                                                         | tiotropium.mp. or exp Tiotropium Bromide/ (1843)                       |
| 11                                                                                                                                                         | aclidinium.mp. (230)                                                   |
| 12                                                                                                                                                         | exp Glycopyrrolate/ or glycopyrronium.mp. (1222)                       |
| 13                                                                                                                                                         | glycopyrrolate.mp. (1478)                                              |
| 14                                                                                                                                                         | umeclidinium.mp. (243)                                                 |
| 15                                                                                                                                                         | 9 or 10 or 11 or 12 or 13 or 14 (3743)                                 |
| 16                                                                                                                                                         | 8 and 15 (588)                                                         |
| <b>EMBASE</b>                                                                                                                                              |                                                                        |
| <b>Database: Embase &lt;1974 to 2020 December 07&gt;</b>                                                                                                   |                                                                        |
| <b>Search Strategy:</b>                                                                                                                                    |                                                                        |
| 1                                                                                                                                                          | exp asthma/ or asthma.mp. (297062)                                     |
| 2                                                                                                                                                          | wheezing.mp. or exp wheezing/ (32407)                                  |
| 3                                                                                                                                                          | wheeze.mp. or exp wheezing/ (29987)                                    |
| 4                                                                                                                                                          | bronchospasm.mp. or exp bronchospasm/ (28076)                          |
| 5                                                                                                                                                          | exp bronchoconstriction/ or bronchoconstriction.mp. (30966)            |
| 6                                                                                                                                                          | bronchial hyperreactivity.mp. or exp bronchus hyperreactivity/ (13713) |
| 7                                                                                                                                                          | reactive airway disease.mp. (548)                                      |
| 8                                                                                                                                                          | 1 or 2 or 3 or 4 or 5 or 6 or 7 (331501)                               |
| 9                                                                                                                                                          | long acting muscarinic antagonist.mp. (1128)                           |
| 10                                                                                                                                                         | tiotropium.mp. or exp tiotropium bromide/ (6575)                       |
| 11                                                                                                                                                         | aclidinium.mp. or exp aclidinium bromide/ (827)                        |
| 12                                                                                                                                                         | glycopyrronium.mp. or exp glycopyrronium/ (7417)                       |
| 13                                                                                                                                                         | glycopyrrolate.mp. (1420)                                              |
| 14                                                                                                                                                         | exp umeclidinium/ or umeclidinium.mp. (843)                            |
| 15                                                                                                                                                         | 9 or 10 or 11 or 12 or 13 or 14 (14297)                                |
| 16                                                                                                                                                         | 8 and 15 (2868)                                                        |
| <b>Cochrane Central Register of Controlled Trials (CENTRAL)</b>                                                                                            |                                                                        |
| 1                                                                                                                                                          | asthma (9244)                                                          |
| 2                                                                                                                                                          | MeSH descriptor: [Asthma] explode all trees (11669)                    |
| 3                                                                                                                                                          | Wheez* (1066)                                                          |
| 4                                                                                                                                                          | bronchial spasm (62)                                                   |
| 5                                                                                                                                                          | MeSH descriptor: [bronchial spasm] explode all trees (391)             |
| 6                                                                                                                                                          | bronchospas*(443)                                                      |
| 7                                                                                                                                                          | bronchoconstriction (274)                                              |
| 8                                                                                                                                                          | MeSH descriptor: [Bronchoconstriction] explode all trees (561)         |
| 9                                                                                                                                                          | bronchoconstrict* (289)                                                |
| 10                                                                                                                                                         | bronchial hyperreactivity (137)                                        |
| 11                                                                                                                                                         | MeSH descriptor: [bronchial hyperreactivity] explode all trees (578)   |
| 12                                                                                                                                                         | reactive airway disease (108)                                          |

|                                                                                                                                                                                                                                                                                                                                                                                                                                                                                                                     |                                                                           |
|---------------------------------------------------------------------------------------------------------------------------------------------------------------------------------------------------------------------------------------------------------------------------------------------------------------------------------------------------------------------------------------------------------------------------------------------------------------------------------------------------------------------|---------------------------------------------------------------------------|
| 13                                                                                                                                                                                                                                                                                                                                                                                                                                                                                                                  | #1 or #2 or #3 or #4 or #5 or #6 or #7 or #8 or #10 or #11 or #12 (10064) |
| 14                                                                                                                                                                                                                                                                                                                                                                                                                                                                                                                  | long acting muscarinic antagonist (202)                                   |
| 15                                                                                                                                                                                                                                                                                                                                                                                                                                                                                                                  | MeSH descriptor: [muscarinic antagonists] explode all trees (896)         |
| 16                                                                                                                                                                                                                                                                                                                                                                                                                                                                                                                  | tiotropium bromide (592)                                                  |
| 17                                                                                                                                                                                                                                                                                                                                                                                                                                                                                                                  | MeSH descriptor: [tiotropium bromide] explode all trees (685)             |
| 18                                                                                                                                                                                                                                                                                                                                                                                                                                                                                                                  | tiotropium (914)                                                          |
| 19                                                                                                                                                                                                                                                                                                                                                                                                                                                                                                                  | aclidinium (102)                                                          |
| 20                                                                                                                                                                                                                                                                                                                                                                                                                                                                                                                  | glycopyrronium (363)                                                      |
| 21                                                                                                                                                                                                                                                                                                                                                                                                                                                                                                                  | glycopyrrolate (410)                                                      |
| 22                                                                                                                                                                                                                                                                                                                                                                                                                                                                                                                  | MeSH descriptor: [glycopyrrolate] explode all trees (475)                 |
| 23                                                                                                                                                                                                                                                                                                                                                                                                                                                                                                                  | umeclidinium (193)                                                        |
| 24                                                                                                                                                                                                                                                                                                                                                                                                                                                                                                                  | #16 or #17 or #18 or #19 or #20 or #21 or #22 or #23 (1665)               |
| 25                                                                                                                                                                                                                                                                                                                                                                                                                                                                                                                  | #14 or #15 or #24 (2537)                                                  |
| 26                                                                                                                                                                                                                                                                                                                                                                                                                                                                                                                  | #13 or #25 (9)                                                            |
| <b>WHO International Clinical Trials Registry Platform (ICTRP)</b>                                                                                                                                                                                                                                                                                                                                                                                                                                                  |                                                                           |
| long acting muscarinic antagonist OR tiotropium bromide OR tiotropium OR aclidinium OR glycopyrronium OR glycopyrrolate OR umeclidinium                                                                                                                                                                                                                                                                                                                                                                             |                                                                           |
| <b>FDA and EMA</b>                                                                                                                                                                                                                                                                                                                                                                                                                                                                                                  |                                                                           |
| - Tiotropium/Tiotropium bromide<br>FDA: Spiriva (NDA #021395)<br>Spiriva Respimat (NDA #207070)<br>Spiriva Respimat (metered) (NDA #021936)                                                                                                                                                                                                                                                                                                                                                                         |                                                                           |
| - Aclidinium/aclidinium bromide<br>FDA: Tudorza Pressair (NDA #202450)<br><br>EMA: Eklira Genuair (MA #EU/1/12/778/001-3)<br>Bretaris Genuair (MA #EU/1/12/781/001-3)<br>Brimica Genuair (MA #EU/1/14/963/001-3)<br>Duaklir Genuair (MA #EU/1/14/964/001-3)                                                                                                                                                                                                                                                         |                                                                           |
| - Glycopyrronium/Glycopyrrolate<br>FDA: Seebri (NDA #207923)<br>Lonhala Magnair Kit (NDA #208437)<br><br>EMA: Tovanor Breezhaler (MA #EU/1/12/790/001-8)<br>Seebri Breezhaler (MA #EU/1/12/788/001-8)<br>Enurev Breezhaler (MA #EU/1/12/789/001-8)<br>Bevespo Aerosphere (MA #EU/1/18/1339/001-2)<br>Trimbow (MA #EU/1/17/1208/001-5)<br>Uluna Breezhaler (MA #EU/1/14/917/001-8)<br>Xoterna Breezhaler (MA #EU/1/13/863/001-8)<br>Ultibrow Breezhaler (MA #EU/1/13/862/001-8)<br>Trydonis (MA #EU/1/18/1274/001-5) |                                                                           |
| - Umeclidinium<br>FDA: Incruse Ellipta (NDA #205382)<br>Trelegy Ellipta (NDA #209482)<br><br>EMA: Incruse Ellipta (MA #EU/1/14/922/001-3)<br>Rolufta Ellipta (MA #EU/1/17/1174/001-3)<br>Laventair Ellipta (MA #EU/1/14/899/001-3)<br>Anoro Ellipta (MA #EU/1/14/898/001-3)<br>Trelegy Ellipta (MA #EU/1/17/1236/001-3)<br>Tembyric Ellipta (MA #EU/1/19/1378/001-3)<br>Elebrato Ellipta (MA #EU/1/17/1237/001-3)                                                                                                   |                                                                           |

## eMethods 2. Additional Methods Details

For dichotomous outcomes, we calculated the risk ratio (RR) with 95% confidence interval (CI). Outcomes that could occur more than once per patient (eg. exacerbations) were pooled as incidence rate ratios (IRR) with 95%CI. For time-to-event outcomes, we extracted patient-level time-to-event data by digitizing Kaplan-Meier curves<sup>1</sup>, validating proportional hazards assumptions, fitting shared frailty Cox regression models with study as random effects, and reporting hazard ratio (HR) with 95% CI. We also verified each extracted studies' HR matched its reported one. We compared these results to meta-analysis of HRs reported in aggregate form. For rare dichotomous outcomes (mortality, serious cardiovascular events), we pooled risk differences with sensitivity analyses using Bayesian random effects meta-analyses of risk ratios with noninformative priors for treatment effects and Turner priors<sup>2</sup> for between-study heterogeneity. For continuous outcomes, we calculated the mean difference with 95% CI and if different scales were used between studies, we converted all scales to have the same directionality and then pooled effects as standardized mean difference (SMD) using hedges' g. If the standard deviations for change from baseline estimates for continuous outcomes were not available, then we used 1) mean of correlation coefficient calculated from the included studies<sup>3</sup> and 2) imputed correlation coefficient of 0.7 as it is a more realistic assumption and the results were robust to sensitivity analysis with a more conservative assumption of correlation coefficient of 0.5. All analyses were completed by complete case scenario according to the assigned groups and the total number of randomized patients for each outcome is reported throughout the main text. To facilitate interpretability, we then converted these pooled SMDs to the most familiar scale (eg. ACQ-7) using the median SD across included studies<sup>4</sup>. For each continuous outcome, we also present relative and absolute treatment effects according to the probability of achieving the minimal important difference (MID), calculated using the median and standard deviation of the control group and the pooled mean difference to estimate the mean in the treatment group<sup>4</sup>. Minimally important difference for ACQ score and AQLQ score have been both reported to be 0.5. Crossover trials were accounted for as parallel group studies and according to Cochrane guidance, used the first period to reduce the risk of carryover effects when the periods were clearly specified or estimated as such, as a conservative approach<sup>3</sup>. Severe asthma exacerbation was defined by a need for systemic steroids for  $\geq 3$  days, hospitalization, intensive care admission or intubation, or emergency department visits. Asthma worsening was defined as a progressive increase in one or more asthma symptoms or a decline in lung function (i.e.  $\geq 30\%$  decrease in peak expiratory flow) for two or more consecutive days that does not meet definition of severe asthma exacerbation.

GRADE assessments of certainty were determined through consideration of study design (RCTs start at high certainty) and five domains: risk of bias, inconsistency, indirectness, imprecision and publication bias. The RCTs were downgraded for any serious concerns per domain and the rationales for downgrading were presented in the Summary of Findings table (eTable 1).

Trial Sequential Analysis (TSA) was completed using TSA Viewer 0.9.5.9 Beta (Copenhagen: Copenhagen Trial Unit, Centre for Clinical Intervention Research, Rigshospitalet, 2016), Lan-DeMets implementation of the O'Brien-Fleming monitoring boundaries<sup>5</sup>, adjustment for heterogeneity, and information size set to a two-sided alpha of 0.05, beta 0.80, 10-30% relative risk reduction and the baseline control-group event rate for each outcome.

| <b>Minimally Clinically Important Difference for ACQ-5, -6, -7 and ACT</b> |                                                                                                 |                                                                                                             |
|----------------------------------------------------------------------------|-------------------------------------------------------------------------------------------------|-------------------------------------------------------------------------------------------------------------|
| <b>Scale</b>                                                               | <b>Notes</b>                                                                                    | <b>MCID</b>                                                                                                 |
| ACQ-7                                                                      | Consists of six disease-related items and an assessment of lung function with FEV <sub>1</sub>  | Scores range between 0 (totally controlled) and 6 (severely uncontrolled)<br><br>MCID: 0.5                  |
| ACQ-6                                                                      | Omits FEV <sub>1</sub> assessment                                                               |                                                                                                             |
| ACQ-5                                                                      | Omits bronchodilator use and FEV <sub>1</sub> assessment                                        |                                                                                                             |
| ACT                                                                        | Comprises 5 items pertaining to symptoms and daily functioning, ranging from a score of 5 to 25 | A score >19 indicates well-controlled asthma<br><br>MCID:<br>for adults, 3 points<br>for children, 2 points |

|                                      |
|--------------------------------------|
| Definitions of Adverse Events by FDA |
|--------------------------------------|

|                            |                                                                                                                                                                                                                                                                                                                                                                                                                                                                                                                                                                                                                                                                                                                                                                                          |
|----------------------------|------------------------------------------------------------------------------------------------------------------------------------------------------------------------------------------------------------------------------------------------------------------------------------------------------------------------------------------------------------------------------------------------------------------------------------------------------------------------------------------------------------------------------------------------------------------------------------------------------------------------------------------------------------------------------------------------------------------------------------------------------------------------------------------|
| Serious Adverse Events     | An adverse event or suspected adverse reaction is considered "serious" if, in the view of either the investigator or sponsor, it results in any of the following outcomes: Death, a life-threatening adverse event, inpatient hospitalization or prolongation of existing hospitalization, a persistent or significant incapacity or substantial disruption of the ability to conduct normal life functions, or a congenital anomaly/birth defect. Important medical events that may not result in death, be life-threatening, or require hospitalization may be considered serious when, based upon appropriate medical judgment, they may jeopardize the patient or subject and may require medical or surgical intervention to prevent one of the outcomes listed in this definition. |
| Non-serious Adverse Events | Any untoward medical occurrence associated with the use of a drug in humans, whether or not considered drug related.                                                                                                                                                                                                                                                                                                                                                                                                                                                                                                                                                                                                                                                                     |

Pre-specified subgroup included stratification by study risk of bias, design (parallel vs cross-over), history of previous exacerbation ( $\geq 1$  vs.  $< 1$  in the past year), population age, dose and type of triple therapy, and comparator dose and type. Tests for interaction were done in RevMan version 5.3, which tests mean effects between subgroups<sup>6</sup>. Sensitivity analyses to test the robustness of the findings included 1) worst-case or various plausible scenarios for missing participants, 2) reweighing trials using fixed-effect analysis, 3) excluding unpublished trials, 4) excluding cross-over trials, 5) analyzing different doses of the intervention independently rather than collapsing them as Cochrane guidance suggests to<sup>3</sup> 6) using the more conservative Knapp-Hartung-Sidik-Jonkman random effects meta-analytic method<sup>7</sup>, and 7) using different correlation coefficients (0.5 and 0.7) and averaged SD for change from baseline continuous outcomes.

To account for double zeros in the mortality dataset, we analyzed using a Bayesian approach to pool relative risks, or a frequentist approach to pool risk differences<sup>3</sup>. In addition to the standard frequentist approach, we synthesized the available evidence with a Bayesian approach using hybrid Metropolis-Hastings and Gibbs sampling, a 10,000 sample burn-in, 40,000 Markov chain Monte-Carlo (MCMC) samples and noninformative (mean 0, variance 5) priors for the mean effect, and Turner<sup>6</sup> priors for estimates of heterogeneity, to inform mean posterior estimates of effect and 95% credible intervals (CrIs). Model convergence was confirmed in all cases with good mixing in visual inspection of trace plots, autocorrelation plots, histograms, and kernel density estimates in all scenarios. Parameters were blocked, leading to acceptance of approximately 50% and efficiency  $> 1\%$  in all cases.

**eMethods 3. PRISMA Checklist.**

| Section/topic                      | #  | Checklist item                                                                                                                                                                                                                                                                                              | Reported on page # |
|------------------------------------|----|-------------------------------------------------------------------------------------------------------------------------------------------------------------------------------------------------------------------------------------------------------------------------------------------------------------|--------------------|
| <b>TITLE</b>                       |    |                                                                                                                                                                                                                                                                                                             |                    |
| Title                              | 1  | Identify the report as a systematic review, meta-analysis, or both.                                                                                                                                                                                                                                         | 1                  |
| <b>ABSTRACT</b>                    |    |                                                                                                                                                                                                                                                                                                             |                    |
| Structured summary                 | 2  | Provide a structured summary including, as applicable: background; objectives; data sources; study eligibility criteria, participants, and interventions; study appraisal and synthesis methods; results; limitations; conclusions and implications of key findings; systematic review registration number. | 3-4                |
| <b>INTRODUCTION</b>                |    |                                                                                                                                                                                                                                                                                                             |                    |
| Rationale                          | 3  | Describe the rationale for the review in the context of what is already known.                                                                                                                                                                                                                              | 5-6                |
| Objectives                         | 4  | Provide an explicit statement of questions being addressed with reference to participants, interventions, comparisons, outcomes, and study design (PICOS).                                                                                                                                                  | 6                  |
| <b>METHODS</b>                     |    |                                                                                                                                                                                                                                                                                                             |                    |
| Protocol and registration          | 5  | Indicate if a review protocol exists, if and where it can be accessed (e.g., Web address), and, if available, provide registration information including registration number.                                                                                                                               | 7                  |
| Eligibility criteria               | 6  | Specify study characteristics (e.g., PICOS, length of follow-up) and report characteristics (e.g., years considered, language, publication status) used as criteria for eligibility, giving rationale.                                                                                                      | 7                  |
| Information sources                | 7  | Describe all information sources (e.g., databases with dates of coverage, contact with study authors to identify additional studies) in the search and date last searched.                                                                                                                                  | 7                  |
| Search                             | 8  | Present full electronic search strategy for at least one database, including any limits used, such that it could be repeated.                                                                                                                                                                               | eMethods 1         |
| Study selection                    | 9  | State the process for selecting studies (i.e., screening, eligibility, included in systematic review, and, if applicable, included in the meta-analysis).                                                                                                                                                   | 7                  |
| Data collection process            | 10 | Describe method of data extraction from reports (e.g., piloted forms, independently, in duplicate) and any processes for obtaining and confirming data from investigators.                                                                                                                                  | 8-9                |
| Data items                         | 11 | List and define all variables for which data were sought (e.g., PICOS, funding sources) and any assumptions and simplifications made.                                                                                                                                                                       | 8-9                |
| Risk of bias in individual studies | 12 | Describe methods used for assessing risk of bias of individual studies (including specification of whether this was done at the study or outcome level), and how this information is to be used in any data synthesis.                                                                                      | 10                 |

|                      |    |                                                                                                                                                                    |                  |
|----------------------|----|--------------------------------------------------------------------------------------------------------------------------------------------------------------------|------------------|
| Summary measures     | 13 | State the principal summary measures (e.g., risk ratio, difference in means).                                                                                      | 11, eMethods 2   |
| Synthesis of results | 14 | Describe the methods of handling data and combining results of studies, if done, including measures of consistency (e.g., I <sup>2</sup> ) for each meta-analysis. | 9-13, eMethods 2 |

Page 1 of 2

| Section/topic                 | #  | Checklist item                                                                                                                                                                                           | Reported on page #                   |
|-------------------------------|----|----------------------------------------------------------------------------------------------------------------------------------------------------------------------------------------------------------|--------------------------------------|
| Risk of bias across studies   | 15 | Specify any assessment of risk of bias that may affect the cumulative evidence (e.g., publication bias, selective reporting within studies).                                                             | 10-11, eFigure 1                     |
| Additional analyses           | 16 | Describe methods of additional analyses (e.g., sensitivity or subgroup analyses, meta-regression), if done, indicating which were pre-specified.                                                         | 9-13, eMethods 2                     |
| <b>RESULTS</b>                |    |                                                                                                                                                                                                          |                                      |
| Study selection               | 17 | Give numbers of studies screened, assessed for eligibility, and included in the review, with reasons for exclusions at each stage, ideally with a flow diagram.                                          | 14, Fig 1                            |
| Study characteristics         | 18 | For each study, present characteristics for which data were extracted (e.g., study size, PICOS, follow-up period) and provide the citations.                                                             | 14-15, Table 1                       |
| Risk of bias within studies   | 19 | Present data on risk of bias of each study and, if available, any outcome level assessment (see item 12).                                                                                                | 15, eFigure 1                        |
| Results of individual studies | 20 | For all outcomes considered (benefits or harms), present, for each study: (a) simple summary data for each intervention group (b) effect estimates and confidence intervals, ideally with a forest plot. | 15-18, Fig2-4, eTable 1, eFigure 3-7 |
| Synthesis of results          | 21 | Present results of each meta-analysis done, including confidence intervals and measures of consistency.                                                                                                  | 15-18, Fig2-3, eTable 1, eFigure 3-7 |
| Risk of bias across studies   | 22 | Present results of any assessment of risk of bias across studies (see Item 15).                                                                                                                          | eTable 1                             |
| Additional analysis           | 23 | Give results of additional analyses, if done (e.g., sensitivity or subgroup analyses, meta-regression [see Item 16]).                                                                                    | 18-19, eTable 3                      |
| <b>DISCUSSION</b>             |    |                                                                                                                                                                                                          |                                      |
| Summary of evidence           | 24 | Summarize the main findings including the strength of evidence for each main outcome; consider their relevance to key groups (e.g., healthcare providers, users, and policy makers).                     | 20                                   |
| Limitations                   | 25 | Discuss limitations at study and outcome level (e.g., risk of bias), and at review-level (e.g., incomplete retrieval of identified research, reporting bias).                                            | 23                                   |

|                |    |                                                                                                                                            |       |
|----------------|----|--------------------------------------------------------------------------------------------------------------------------------------------|-------|
| Conclusions    | 26 | Provide a general interpretation of the results in the context of other evidence, and implications for future research.                    | 24    |
| <b>FUNDING</b> |    |                                                                                                                                            |       |
| Funding        | 27 | Describe sources of funding for the systematic review and other support (e.g., supply of data); role of funders for the systematic review. | 1, 25 |

*From:* Moher D, Liberati A, Tetzlaff J, Altman DG, The PRISMA Group (2009). Preferred Reporting Items for Systematic Reviews and Meta-Analyses: The PRISMA Statement. PLoS Med 6(6): e1000097. doi:10.1371/journal.pmed1000097 For more information, visit: [www.prisma-statement.org](http://www.prisma-statement.org). Page 2 of 2



**eTable 1. Summary of findings:**

**Triple therapy (ICS/LABA/LAMA) compared to dual therapy (ICS/LABA) for asthma**

| Outcome<br>№ of participants<br>(studies)                                                                        | Relative effect<br>(95% CI)                      | Anticipated absolute effects (95% CI)                                                                          |                                |                                                         | Certainty                     | What happens<br>(Standardized GRADE terminology <sup>a</sup> )                                                                                                                                                                                                                                                                                                                          |
|------------------------------------------------------------------------------------------------------------------|--------------------------------------------------|----------------------------------------------------------------------------------------------------------------|--------------------------------|---------------------------------------------------------|-------------------------------|-----------------------------------------------------------------------------------------------------------------------------------------------------------------------------------------------------------------------------------------------------------------------------------------------------------------------------------------------------------------------------------------|
|                                                                                                                  |                                                  | Dual Therapy                                                                                                   | Triple Therapy                 | Difference                                              |                               |                                                                                                                                                                                                                                                                                                                                                                                         |
| Severe exacerbations<br>(RR)<br>№ of participants:<br>9701<br>(9 RCTs)                                           | <b>RR 0.83</b><br>(0.77 to 0.90)                 | <b>Study population, history of exacerbation</b>                                                               |                                |                                                         | ⊕⊕⊕⊕<br>HIGH                  | Triple therapy (ICS/LABA/LAMA) reduces severe exacerbations. Risk for future exacerbation leads to important changes in anticipated absolute effects.                                                                                                                                                                                                                                   |
|                                                                                                                  |                                                  | 30.0%                                                                                                          | <b>24.6%</b><br>(22.5 to 26.7) | <b>5.4% fewer</b><br>(7.5 to 3.3 fewer)                 |                               |                                                                                                                                                                                                                                                                                                                                                                                         |
|                                                                                                                  |                                                  | <b>Study population no history of exacerbation</b>                                                             |                                |                                                         |                               |                                                                                                                                                                                                                                                                                                                                                                                         |
|                                                                                                                  |                                                  | 2.7%                                                                                                           | <b>2.2%</b><br>(2 to 2.4)      | <b>0.5% fewer</b><br>(0.7 to 0.3 fewer)                 |                               |                                                                                                                                                                                                                                                                                                                                                                                         |
| Severe exacerbation rate (IRR)<br>№ of participants:<br>10048<br>(7 RCTs)                                        | <b>Rate ratio 0.85</b><br>(0.78 to 0.92)         | <b>Cohorts (US database), no exacerbation<sup>9</sup></b>                                                      |                                |                                                         | ⊕⊕⊕⊕<br>HIGH                  | Triple therapy (ICS/LABA/LAMA) reduces severe exacerbation rate. Risk for future exacerbation, including severity of asthma, leads to important changes in anticipated absolute effects.                                                                                                                                                                                                |
|                                                                                                                  |                                                  | 11.0%                                                                                                          | <b>9.0%</b><br>(8.3 to 9.8)    | <b>2.0% fewer</b><br>(2.8 to 1.2 fewer)                 |                               |                                                                                                                                                                                                                                                                                                                                                                                         |
|                                                                                                                  |                                                  | <b>GINA 3<sup>a</sup> c</b>                                                                                    |                                |                                                         |                               |                                                                                                                                                                                                                                                                                                                                                                                         |
|                                                                                                                  |                                                  | 14.3%                                                                                                          | <b>12.2%</b><br>(11.2 to 13.2) | <b>2.1% fewer</b><br>(3.1 to 1.1 fewer)                 |                               |                                                                                                                                                                                                                                                                                                                                                                                         |
| Severe exacerbation time-to-event (HR)<br>№ of participants:<br>8583<br>(6 RCTs)                                 | <b>HR 0.84</b><br>(0.77 to 0.92)                 | <b>GINA 4<sup>a</sup> d</b>                                                                                    |                                |                                                         | ⊕⊕⊕⊕<br>HIGH                  | Triple therapy (ICS/LABA/LAMA) improves severe exacerbation time-to-event. Risk for future exacerbation leads to important changes in anticipated absolute effects.                                                                                                                                                                                                                     |
|                                                                                                                  |                                                  | 15.3%                                                                                                          | <b>13.0%</b><br>(11.9 to 14.1) | <b>2.3% fewer</b><br>(3.4 to 1.2 fewer)                 |                               |                                                                                                                                                                                                                                                                                                                                                                                         |
|                                                                                                                  |                                                  | <b>GINA 5<sup>a</sup> e</b>                                                                                    |                                |                                                         |                               |                                                                                                                                                                                                                                                                                                                                                                                         |
|                                                                                                                  |                                                  | 45.5%                                                                                                          | <b>38.7%</b><br>(35.5 to 41.9) | <b>6.8% fewer</b><br>(10 to 3.6 fewer)                  |                               |                                                                                                                                                                                                                                                                                                                                                                                         |
| Asthma control assessed with: ACQ (lower better; MID 0.5)<br>№ of participants:<br>10967<br>(14 RCTs)            | <b>RR to achieve MID 1.04</b><br>(1.01 to 1.06)  | <b>Low risk for future exacerbation</b>                                                                        |                                |                                                         | ⊕⊕⊕⊕<br>HIGH                  | Triple therapy (ICS/LABA/LAMA) results in a slight improvement in asthma control which may be clinically unimportant.                                                                                                                                                                                                                                                                   |
|                                                                                                                  |                                                  | The mean asthma control was <b>1.46</b> (median of mean change from baseline -0.72 SD 0.66)<br>MID: 62.9%      | -                              | <b>MD 0.04 better</b><br>(0.01 to 0.07 better)          |                               |                                                                                                                                                                                                                                                                                                                                                                                         |
| Quality of life assessed with: AQLQ (higher better; MID 0.5)<br>№ of participants:<br>4825<br>(6 RCTs)           | <b>RR to achieve MID 1.03</b><br>(0.98 to 1.09)  | <b>High risk for future exacerbation</b>                                                                       |                                |                                                         | ⊕⊕⊕○<br>MODERATE <sup>a</sup> | Triple therapy (ICS/LABA/LAMA) likely results in little to no difference in quality of life.                                                                                                                                                                                                                                                                                            |
|                                                                                                                  |                                                  | 30.0%                                                                                                          | <b>25.9%</b><br>(23.1 to 27.6) | <b>4.1% fewer</b><br>(6.9 to 2.4 fewer)                 |                               |                                                                                                                                                                                                                                                                                                                                                                                         |
| Lung function assessed with: FEV <sub>1</sub> (litres, MID 0.1-0.2L)<br>№ of participants:<br>11990<br>(18 RCTs) | <b>RR increase ≥ 0.2L 1.27</b><br>(1.22 to 1.32) | <b>MD 0.05 better</b><br>(0.03 worse to 0.13 better)                                                           |                                |                                                         | ⊕⊕⊕○<br>MODERATE <sup>a</sup> | Triple therapy (ICS/LABA/LAMA) likely results in little to no difference in quality of life.                                                                                                                                                                                                                                                                                            |
|                                                                                                                  |                                                  | The mean quality of life was <b>5.50</b> (median of mean change from baseline 0.66 SD 1.01)<br>MID: 56.2%      | -                              | <b>MD 0.05 better</b><br>(0.03 worse to 0.13 better)    |                               |                                                                                                                                                                                                                                                                                                                                                                                         |
| Lung function assessed with: FEV <sub>1</sub> (litres, MID 0.1-0.2L)<br>№ of participants:<br>11990<br>(18 RCTs) | <b>RR increase ≥ 0.2L 1.27</b><br>(1.22 to 1.32) | <b>MD 0.08 litres greater</b><br>(0.07 to 0.10 greater)                                                        |                                |                                                         | ⊕⊕⊕⊕<br>HIGH                  | Triple therapy (ICS/LABA/LAMA) results in a slight increase in lung function.                                                                                                                                                                                                                                                                                                           |
|                                                                                                                  |                                                  | The mean lung function was <b>1.70 L</b> (median of mean change from baseline 0.10L SD 0.32L)<br>≥ 0.2L: 37.4% | -                              | <b>MD 0.08 litres greater</b><br>(0.07 to 0.10 greater) |                               |                                                                                                                                                                                                                                                                                                                                                                                         |
| Treatment-related adverse events<br>№ of participants:<br>7024<br>(8 RCTs)                                       | <b>RR 1.18</b><br>(0.96 to 1.46)                 | 5.3%                                                                                                           | <b>6.3%</b><br>(5.1 to 7.8)    | <b>1.0% more</b><br>(0.2 fewer to 2.4 more)             | ⊕⊕⊕○<br>MODERATE <sup>b</sup> | Triple therapy (ICS/LABA/LAMA) likely results in little to no difference in treatment-related adverse events. Similar findings for any adverse event, Serious Adverse Events, pulmonary infectious adverse events, eye-related adverse events, and arrhythmia.<br><br>Triple therapy slightly increases dry mouth/dysphonia (3.0% vs. 1.8%; RR 1.65 [95%CI 1.14-2.38], high certainty). |

**eTable 1. Summary of findings:**

**Triple therapy (ICS/LABA/LAMA) compared to dual therapy (ICS/LABA) for asthma**

| Outcome<br>No of participants<br>(studies)                  | Relative effect<br>(95% CI)          | Anticipated absolute effects (95% CI) |                               |                                                     | Certainty    | What happens<br>(Standardized GRADE terminology <sup>8</sup> )                                  |
|-------------------------------------------------------------|--------------------------------------|---------------------------------------|-------------------------------|-----------------------------------------------------|--------------|-------------------------------------------------------------------------------------------------|
|                                                             |                                      | Dual Therapy                          | Triple Therapy                | Difference                                          |              |                                                                                                 |
| All cause mortality<br>No of participants:<br>9761 (9 RCTs) | <b>RD 0.02%</b><br>(-0.16% to 0.21%) | 0.12%                                 | <b>0.14%</b><br>(0% to 0.33%) | <b>0.02% more</b><br>(0.16% fewer to<br>0.21% more) | ⊕⊕⊕⊕<br>HIGH | Triple therapy (ICS/LABA/LAMA) results<br>in little to no difference in all-cause<br>mortality. |

The risk in the intervention group (and its 95% confidence interval) is based on the assumed risk in the comparison group and the relative effect of the intervention (and its 95% CI).

**GINA:** Global Initiative for Asthma; **CI:** Confidence interval; **RR:** Risk ratio; **HR:** Hazard Ratio; **MD:** Mean difference. [Click here for an online-interactive Summary of Findings \(gradepr.org\), https://bit.ly/JAMATripleTherapy](#)

**GRADE Working Group grades of evidence**

**GRADE domains considered in rating the certainty of evidence:** Risk of bias, inconsistency, indirectness, imprecision, publication bias, residual confounding, effect magnitude, and dose-response relationship. Serious concerns in the first five domains lead to rating down the certainty of the evidence. Explanations for rating down are detailed in the footnotes. If the evidence is rated as high certainty there are no serious concerns with any of the domains.

**High certainty:** We are very confident that the true effect lies close to that of the estimate of the effect

**Moderate certainty:** We are moderately confident in the effect estimate: The true effect is likely to be close to the estimate of the effect, but there is a possibility that it is not

**Low certainty:** Our confidence in the effect estimate is limited: The true effect may be substantially different from the estimate of the effect

**Very low certainty:** We have very little confidence in the effect estimate: The true effect is likely to be substantially different from the estimate of effect

a. Could be imprecise due to CIs crossing zero, but not so imprecise that it crosses the MID of 0.5 on either side of the mean effect. Nevertheless, we conservatively rated down for imprecision.

b. Could be imprecise due to CIs crossing zero, but the upper and lower 95%CI bounds of absolute effects are likely clinically unimportant. Nevertheless, we conservatively rated down for imprecision.

c. **GINA 3:** Patients controlled on low dose ICS-LABA maintenance and reliever therapy, daily low dose ICS-LABA maintenance plus as-needed SABA, or low dose ICS-leukotriene receptor antagonist

d. **GINA 4:** Patients controlled on medium dose ICS-LABA as maintenance and reliever therapy, medium dose ICS-LABA maintenance plus as-needed SABA, or high dose ICS-LABA

e. **GINA 5:** Patients not controlled despite GINA step 4 therapy

**ACQ:** ACQ-7 is a 7-item list that contains 5 symptoms-based questions, rescue bronchodilator use, and FEV<sub>1</sub> assessment with each item scored on a 7-point scale (0=no impairment to 6=maximum impairment)<sup>18</sup>. ACQ-6 contains all items of ACQ-7 except FEV<sub>1</sub> assessment<sup>18,23</sup>. ACQ-5 only contains 5 symptoms-based questions<sup>23</sup>. The questions are equally weighted and ACQ score is the mean of the included questions ranging from 0 [totally controlled] to 6 [severely uncontrolled]<sup>18</sup>. MCID for a change in ACQ is 0.5 for all three questionnaires<sup>18</sup>.

**ACT:** ACT is a 5-item list with each item scored on a 5-point scale (for symptoms and activity-related rating: 1=all the time to 5=not at all; for asthma control rating: 1=not controlled at all to 5=completely controlled)<sup>19</sup>. The total score ranges from 5 (poor control of asthma) to 25 (complete control of asthma)<sup>19</sup>. MCID for a change in ACT is 3<sup>19</sup>.

**AQLQ and mini-AQLQ:** AQLQ score is a 32-item list with each item scored on a 7-point scale (1=severely impaired to 7=not impaired at all)<sup>20</sup>. Mini-AQLQ is a shorter 15-item list version of AQLQ<sup>21</sup>. The higher score on both questionnaires correlates with better quality of life<sup>21,24</sup>. The MCID for a change in both AQLQ and mini-AQLQ is 0.5<sup>24</sup>

**eTable 2. Inclusion/Exclusion criteria**

| Author, year (#)   | Inclusion criteria                                                                                                                                                                                                                                                                                                                                                                                                                                                                   | Exclusion criteria                                                                                                                                        |
|--------------------|--------------------------------------------------------------------------------------------------------------------------------------------------------------------------------------------------------------------------------------------------------------------------------------------------------------------------------------------------------------------------------------------------------------------------------------------------------------------------------------|-----------------------------------------------------------------------------------------------------------------------------------------------------------|
| Hamelmann, 2017    | Aged 12–17 years<br>Asthma for $\geq 3$ months<br>Symptomatic asthma with ACQ-7 $\geq 1.5$<br>Receipt of high-dose ICS $\geq 1+$ controllers or medium-dose ICS + $\geq 2+$ controllers for $\geq 4$ weeks prior<br>Prebronchodilator FEV1 60–90% predicted<br>FEV1 reversibility $\geq 12\%$ and $\geq 200$ mL after salbutamol<br>Variability of absolute FEV1 from screening to randomisation within $\pm 30\%$<br>Never smoked or stopped smoking $\geq 1$ year before enrolment | Any significant disease other than asthma                                                                                                                 |
| Hoshino, 2018      | Asthma for $\geq 3$ months<br>Symptomatic at the time of screening<br>Receiving ICS + LABA for 4 or more weeks prior to the screening<br>FEV1 $> 60\%$ of the predicted<br>Never smoked or $< 5$ pack-years and stopped $\geq 1$ year prior                                                                                                                                                                                                                                          | COPD or any respiratory disease other than asthma<br>Glaucoma<br>Prostatic hyperplasia<br>Respiratory tract infection in the 2 weeks prior to screening   |
| Ishiura, 2019      | Documented asthma and COPD (proven airway hyperresponsiveness and incomplete reversible airway obstruction)<br>Receiving ICS+LABA                                                                                                                                                                                                                                                                                                                                                    | Not Reported                                                                                                                                              |
| Ishiura, 2020      | Documented asthma and COPD (proven airway hyperresponsiveness and incomplete reversible airway obstruction)<br>Receiving ICS+LABA                                                                                                                                                                                                                                                                                                                                                    | oral steroid therapy for at least 8 weeks prior to participation.<br>Unstable moderate to severe symptoms                                                 |
| Jabbal, 2017       | Aged $\geq 18$ years<br>Persistent asthma<br>Minimum FEV1 of $> 50\%$ predicted<br>Mannitol responsive<br>Receiving an ICS or ICS + LABA                                                                                                                                                                                                                                                                                                                                             | Not Reported                                                                                                                                              |
| Jabbal, 2020       | Aged 18-65 years<br>Persistent asthma<br>Current smoking<br>Receipt of at least 400ug per day of ICS (as HFA-budesonide equivalent dose)                                                                                                                                                                                                                                                                                                                                             | History of COPD or asthma-COPD overlap<br>Asthma exacerbations requiring systemic steroids within 1 month or requiring hospital admission within 3 months |
| Kerstjens, 2011    |                                                                                                                                                                                                                                                                                                                                                                                                                                                                                      |                                                                                                                                                           |
| Kerstjens, 2012 #1 | Aged 18-75 years<br>Asthma for $\geq 5$ years, diagnosed before 40 years<br>Symptomatic asthma with ACQ-7 $\geq 1.5$                                                                                                                                                                                                                                                                                                                                                                 | COPD or other serious coexisting illnesses<br>Concurrent use of anticholinergic bronchodilators                                                           |

| Author, year (#)   | Inclusion criteria                                                                                                                                                                                                                                                                                                                                                                                                                                         | Exclusion criteria                                                                                                                                                                                                                                                                                                                                                                                                                                                                                                                                                                                                                                                                                                                                                                                                                                                                                                                                                                                                                                                                                                                                                                                                                                                                                                    |
|--------------------|------------------------------------------------------------------------------------------------------------------------------------------------------------------------------------------------------------------------------------------------------------------------------------------------------------------------------------------------------------------------------------------------------------------------------------------------------------|-----------------------------------------------------------------------------------------------------------------------------------------------------------------------------------------------------------------------------------------------------------------------------------------------------------------------------------------------------------------------------------------------------------------------------------------------------------------------------------------------------------------------------------------------------------------------------------------------------------------------------------------------------------------------------------------------------------------------------------------------------------------------------------------------------------------------------------------------------------------------------------------------------------------------------------------------------------------------------------------------------------------------------------------------------------------------------------------------------------------------------------------------------------------------------------------------------------------------------------------------------------------------------------------------------------------------|
|                    | Postbronchodilator FEV1 $\leq$ 80% predicted and $\leq$ 70% FVC after salbutamol<br>Receiving ICS + LABA<br>$\geq$ 1 asthma exacerbation treated with systemic steroids in the previous year<br>Never smoked or $<$ 10 pack-year history and stopped $\geq$ 1 year prior                                                                                                                                                                                   |                                                                                                                                                                                                                                                                                                                                                                                                                                                                                                                                                                                                                                                                                                                                                                                                                                                                                                                                                                                                                                                                                                                                                                                                                                                                                                                       |
| Kerstjens, 2012 #2 | Aged 18-75 years<br>Asthma for $\geq$ 5 years, diagnosed before 40 years<br>Symptomatic asthma with ACQ-7 $\geq$ 1.5<br>Postbronchodilator FEV1 $\leq$ 80% predicted and $\leq$ 70% FVC after salbutamol<br>Receiving ICS + LABA<br>$\geq$ 1 asthma exacerbation treated with systemic steroids in the previous year<br>Never smoked or $<$ 10 pack-year history and stopped $\geq$ 1 year prior                                                           | COPD or other serious coexisting illnesses<br>Concurrent use of anticholinergic bronchodilators                                                                                                                                                                                                                                                                                                                                                                                                                                                                                                                                                                                                                                                                                                                                                                                                                                                                                                                                                                                                                                                                                                                                                                                                                       |
| Kerstjens, 2020    | Aged 18-75 years<br>Asthma for $\geq$ 1 year<br>Receipt of medium- or high-dose ICS + LABA for $\geq$ 3 months prior, stable for $\geq$ 1 month<br>Symptomatic asthma with ACQ-7 $\geq$ 1.5<br>Postbronchodilator FEV1 $\leq$ 80% predicted and $\leq$ 70% FVC after salbutamol<br>Receiving ICS + LABA<br>$\geq$ 1 asthma exacerbation treated with systemic steroids in the previous year<br>Prebronchodilator FEV1 $<$ 80% predicted and $\leq$ 70% FVC | Asthma exacerbation requiring hospitalization, ED visit, or systemic steroids in the last 6 weeks<br>History of intubation for asthma<br>Condition likely to be worsened by ICS administration or at risk participating in study<br>Receipt of a LAMA for asthma within the past 3 months<br>Narrow angle glaucoma<br>Symptomatic prostatic hypertrophy unless stable on treatment<br>Bladder-neck obstruction<br>RTI or asthma worsening within 4 weeks prior<br>Any chronic condition affecting upper respiratory tract which may interfere<br>History of chronic lung disease other than asthma<br>Type 1 diabetes or uncontrolled type II diabetes<br>Significant health condition that might compromise patient safety, compliance, evaluation, or completion of the study<br>Lactose hypersensitivity<br>History of alcohol or other substance use<br>History of non-compliance to medications or unwilling to complete a patient diary<br>Patients who do not maintain regular day/night, waking/sleeping cycles<br>smoking tobacco products within 6 months before screening or a smoking history of greater than 10 pack-years, a chronic lung disease other than asthma, or an asthma exacerbation requiring systemic corticosteroids, hospitalisation, or emergency room visit within 6 weeks of screening |
| Lee, 2020          | Aged $\geq$ 18 years<br>Asthma for at least 1 year<br>Pre-bronchodilator morning FEV1 of $\geq$ 30% to $<$ 85% predicted<br>Change in FEV1 of $\geq$ 12% and $\geq$ 200mL after albuterol or salbutamol<br>Symptomatic with ACQ-6 $\geq$ 1.5                                                                                                                                                                                                               | Asthma exacerbation within the 6 weeks prior to visit 1<br>Diagnosis of COPD or other concurrent respiratory disorder<br>Pneumonia or pneumonia risk factors at screening<br>Clinically significant medical condition including liver disease, cardiac disease, cancer, ECG abnormality                                                                                                                                                                                                                                                                                                                                                                                                                                                                                                                                                                                                                                                                                                                                                                                                                                                                                                                                                                                                                               |

| Author, year (#)  | Inclusion criteria                                                                                                                                                                                                                                                                                                                                                             | Exclusion criteria                                                                                                                                                                                                                                                                                                                                                                                                                                                                                                                                                                                                                                                                                                                                                                                                                                                                                                                                                                                                                                                                                                                                                                                                                                                                                                                                                                                                                                                                                                                                                                                                                                                                                                                                                                                                                                                                                                                                              |
|-------------------|--------------------------------------------------------------------------------------------------------------------------------------------------------------------------------------------------------------------------------------------------------------------------------------------------------------------------------------------------------------------------------|-----------------------------------------------------------------------------------------------------------------------------------------------------------------------------------------------------------------------------------------------------------------------------------------------------------------------------------------------------------------------------------------------------------------------------------------------------------------------------------------------------------------------------------------------------------------------------------------------------------------------------------------------------------------------------------------------------------------------------------------------------------------------------------------------------------------------------------------------------------------------------------------------------------------------------------------------------------------------------------------------------------------------------------------------------------------------------------------------------------------------------------------------------------------------------------------------------------------------------------------------------------------------------------------------------------------------------------------------------------------------------------------------------------------------------------------------------------------------------------------------------------------------------------------------------------------------------------------------------------------------------------------------------------------------------------------------------------------------------------------------------------------------------------------------------------------------------------------------------------------------------------------------------------------------------------------------------------------|
|                   | <p>Documented health-care contact or documented temporary change in asthma therapy for acute asthma symptoms within 1 year before screening</p> <p>Receiving daily ICS + LABA for at least 12 consecutive weeks before pre-screening, at a stable dose for at least 6 weeks prior to pre-screening with an ICS dose of &gt;250ug/d of fluticasone propionate or equivalent</p> | <p>Medical condition that could be impacted by a muscarinic antagonist</p> <p>Drug or alcohol misuse</p> <p>Current smokers or former smokers with &gt;=10 pack-years</p> <p>Pregnant or lactating women, or those planning on becoming pregnant</p> <p>Patients at risk of non-compliance or unable to comply or those with conditions</p>                                                                                                                                                                                                                                                                                                                                                                                                                                                                                                                                                                                                                                                                                                                                                                                                                                                                                                                                                                                                                                                                                                                                                                                                                                                                                                                                                                                                                                                                                                                                                                                                                     |
| Singh, 2014       | <p>Aged ≥18 years</p> <p>Uncontrolled asthma</p> <p>Receiving stable medium doses of ICS+LABA for at least 4 weeks prior</p> <p>Prebronchodilator FEV1 ≥40% and &lt;80% of predicted value</p> <p>Change in FEV1 ≥12% and ≥200mL with salbutamol</p> <p>Symptomatic with ACQ ≥1.5</p> <p>Co-operative attitude and ability to be trained to correctly use the pMDI</p>         | <p>Inability to carry out PFTs or comply with study procedure or intake</p> <p>History of near-fatal asthma, ICU admission for asthma, or frequent exacerbations</p> <p>Asthma exacerbation requiring hospitalization, ED visit, or systemic steroids in the last 4 weeks</p> <p>Lower RTI in the last 4 weeks</p> <p>On therapy for GERD and/or with history of GERD causing asthma symptoms</p> <p>History of seasonal worsening of asthma and cannot complete study outside of allergen season</p> <p>Any other significant lung disease including COPD, cystic fibrosis, bronchiectasis, alpha-1 antitrypsin deficiency</p> <p>Current smoking or ex-smoking with &gt;= 10 pack-years and stopped =&lt; 1 year prior</p> <p>Change in dose, schedule, formulation of ICS + LABA in 4 weeks prior</p> <p>Current or prior treatment with LAMA</p> <p>Current treatment with anti-IgE antibodies</p> <p>Pregnant or lactating women</p> <p>Women of child-bearing potential not using highly effective contraception</p> <p>Receipt of an investigational drug within 2 months prior</p> <p>Clinically significant cardiovascular disease or abnormal ECG</p> <p>Narrow-angle glaucoma, Prostatic hypertrophy, Bladder neck obstruction</p> <p>Other severe acute or chronic medical or psychiatric condition or laboratory abnormality that may increase risk</p> <p>Receipt of a live-attenuated virus vaccination within 2 weeks</p> <p>Lack of mental or legal capacity</p> <p>History of alcohol or drug misuse disorder</p> <p>Intolerance, hypersensitivity or contraindication to beta-agonists, ICS, anticholinergics, or propellant gases/excipients</p> <p>Major surgery within 3 months or planned during trial</p> <p>Current treatment with non-potassium sparing diuretics</p> <p>Current treatment with monoamine oxidase inhibitors or tricyclic antidepressants</p> <p>Receipt of any therapy that could interfere with the study drugs</p> |
| NCT03358147, 2017 | <p>Aged 12-80 years</p> <p>Documented physician diagnosis of asthma</p> <p>Receiving ICS + LABA for &gt;= 4 weeks</p>                                                                                                                                                                                                                                                          | <p>Oral steroids within 4 weeks prior</p> <p>Current smoking, former smoking with &gt;10 pack-years, or stopped &lt;6 months ago</p> <p>History of life-threatening asthma exacerbation</p>                                                                                                                                                                                                                                                                                                                                                                                                                                                                                                                                                                                                                                                                                                                                                                                                                                                                                                                                                                                                                                                                                                                                                                                                                                                                                                                                                                                                                                                                                                                                                                                                                                                                                                                                                                     |

| Author, year (#)         | Inclusion criteria                                                                                                                                                                                                                                                                                                                                                                                                                                                                                                                                                                            | Exclusion criteria                                                                                                                                                                                                                                                                                                                                                                                                                                                                                                                                                                                                             |
|--------------------------|-----------------------------------------------------------------------------------------------------------------------------------------------------------------------------------------------------------------------------------------------------------------------------------------------------------------------------------------------------------------------------------------------------------------------------------------------------------------------------------------------------------------------------------------------------------------------------------------------|--------------------------------------------------------------------------------------------------------------------------------------------------------------------------------------------------------------------------------------------------------------------------------------------------------------------------------------------------------------------------------------------------------------------------------------------------------------------------------------------------------------------------------------------------------------------------------------------------------------------------------|
|                          | <p>Prebronchodilator FEV1 40-85% predicted for those aged 18-80 years, and 40-90% for those aged 12-17 years</p> <p>Acceptable spirometry performance</p>                                                                                                                                                                                                                                                                                                                                                                                                                                     | <p>Treatment for lower RTI or asthma exacerbation within 4 weeks</p> <p>Hospitalization for asthma within 3 months</p> <p>History of or current clinically significant disease</p> <p>Cancer not in remission for <math>\geq 5</math> years</p> <p>Treatment with another investigational study drug within 30 days or 5 half lives</p> <p>Previously randomized in any PT001 study</p>                                                                                                                                                                                                                                        |
| Ohta, 2015               | <p>Aged 18-75 years</p> <p>Asthma for <math>\geq 12</math> weeks, diagnosed before 40 years</p> <p>Change in FEV1 of more than 12% and over 200 mL after salbutamol 400 <math>\mu\text{g}</math></p> <p>Receiving stable medium dose ICS +/- LABA, for <math>\geq 4</math> weeks prior to screening</p> <p>Symptomatic asthma with ACQ-7 score <math>\geq 1.5</math></p> <p>Prebronchodilator FEV1 <math>\geq 60\%</math> and <math>\leq 90\%</math> of predicted normal</p> <p>Never smoked or <math>&lt; 10</math> pack-year history and stopped smoking <math>\geq 1</math> year prior</p> | <p>COPD or other significant unstable concomitant disease</p> <p>On any investigational drug, non-topical beta-blockers or other asthma therapies within 4 weeks prior to enrolment/screening</p> <p>On anti-immunoglobulin E antibodies within 6 months of enrolment/screening</p> <p>Asthma exacerbation or RTI within 4 weeks prior to enrolment/screening</p> <p>Participating in another trial</p> <p>Narrow-angle glaucoma</p> <p>Micturition disorder because of prostatic hyperplasia</p> <p>Failed to complete <math>\geq 80\%</math> of their electronic diary during the run-in period</p>                          |
| Szeffler, 2017           | <p>Aged 6 to 11 years</p> <p>Asthma for at least 6-months</p> <p>Symptomatic with ACQ-IA 38 <math>\geq 1.5</math></p> <p>Receiving stable high dose ICS + <math>\geq 1+</math> controllers or at a stable medium dose ICS + <math>\geq 2+</math> controllers <math>\geq 4</math> weeks before screening</p> <p>Prebronchodilator FEV1 of 60% to 90% of predicted</p> <p>FEV1 reversibility of <math>\geq 12\%</math> after 200-mg salbutamol (albuterol) dose</p> <p>Variability of absolute FEV1 values from screening to randomization <math>\pm 30\%</math></p>                            | <p>Significant disease other than asthma</p>                                                                                                                                                                                                                                                                                                                                                                                                                                                                                                                                                                                   |
| Virchow, 2019 (TRIMARAN) | <p>Aged 18–75 years</p> <p>Asthma for at least 1 year, diagnosed before age 40 years</p> <p>Prebronchodilator FEV1 <math>&lt; 80\%</math> predicted</p> <p>Change in FEV1 of more than 12% and over 200 mL after salbutamol 400 <math>\mu\text{g}</math></p> <p>Symptomatic with ACQ-7 <math>\geq 1.5</math></p> <p>At least one exacerbation requiring systemic corticosteroids, ED visit, or admission to hospital in the previous 12 months</p> <p>Receiving a stable dose of an ICS + LABA for at least 4 weeks before study entry (Medium dose of inhaled corticosteroid)</p>            | <p>History of near fatal asthma or admission to ICU for asthma</p> <p>Severe exacerbation in the 4 weeks before study entry or during run-in period</p> <p>Any other substantial lung disease that could interfere with study assessments</p> <p>Current smokers or former smokers with <math>\geq 10</math> pack-years or who stopped <math>&lt; 1</math> year before screening</p> <p>Current treatment with monoclonal antibodies or other biological drugs</p> <p>Clinically significant cardiovascular conditions or laboratory abnormalities</p> <p>Unstable concurrent disease that could affect efficacy or safety</p> |
| Virchow, 2019 (TRIGGER)  | <p>Aged 18–75 years</p> <p>Asthma for at least 1 year, diagnosed before age 40 years</p> <p>Prebronchodilator FEV1 <math>&lt; 80\%</math> predicted</p> <p>Change in FEV1 of more than 12% and over 200 mL after salbutamol 400 <math>\mu\text{g}</math></p> <p>Symptomatic with ACQ-7 <math>\geq 1.5</math></p>                                                                                                                                                                                                                                                                              | <p>History of near fatal asthma or admission to ICU for asthma</p> <p>Severe exacerbation in the 4 weeks before study entry or during run-in period</p> <p>Any other substantial lung disease that could interfere with study assessments</p> <p>Current smokers or former smokers with <math>\geq 10</math> pack-years or who stopped <math>&lt; 1</math> year before screening</p> <p>Current treatment with monoclonal antibodies or other biological drugs</p>                                                                                                                                                             |

| Author, year (#) | Inclusion criteria                                                                                                                                                                                                                                                                                                                                                           | Exclusion criteria                                                                                                                                                                                                                                                                                                                                                                                                                                                                                                                                                                                                                                                                                                                                                                                                                                                                                                                                                                                                                                                                                                                                                                                                                                                                                                                                                                                                                                |
|------------------|------------------------------------------------------------------------------------------------------------------------------------------------------------------------------------------------------------------------------------------------------------------------------------------------------------------------------------------------------------------------------|---------------------------------------------------------------------------------------------------------------------------------------------------------------------------------------------------------------------------------------------------------------------------------------------------------------------------------------------------------------------------------------------------------------------------------------------------------------------------------------------------------------------------------------------------------------------------------------------------------------------------------------------------------------------------------------------------------------------------------------------------------------------------------------------------------------------------------------------------------------------------------------------------------------------------------------------------------------------------------------------------------------------------------------------------------------------------------------------------------------------------------------------------------------------------------------------------------------------------------------------------------------------------------------------------------------------------------------------------------------------------------------------------------------------------------------------------|
|                  | <p>At least one exacerbation requiring systemic corticosteroids, ED visit, or admission to hospital in the previous 12 months</p> <p>Receiving a stable dose of an ICS + LABA for at least 4 weeks before study entry (High dose of inhaled corticosteroid)</p>                                                                                                              | <p>Clinically significant cardiovascular conditions or laboratory abnormalities</p> <p>Unstable concurrent disease that could affect efficacy or safety</p>                                                                                                                                                                                                                                                                                                                                                                                                                                                                                                                                                                                                                                                                                                                                                                                                                                                                                                                                                                                                                                                                                                                                                                                                                                                                                       |
| Wang, 2015       | <p>Moderate asthma with daily symptoms, exacerbations that may affect activity and sleep, nocturnal symptoms more than once a week, daily use of inhaled SABA, FEV1 or PEF 60%-80% predicted, and PEF or FEV1 variability &gt;30%</p> <p>ACT score 12-20</p>                                                                                                                 | Not Reported                                                                                                                                                                                                                                                                                                                                                                                                                                                                                                                                                                                                                                                                                                                                                                                                                                                                                                                                                                                                                                                                                                                                                                                                                                                                                                                                                                                                                                      |
| Watz, 2020       | <p>Aged 18-75 years</p> <p>Documented physician diagnosis of asthma for <math>\geq 12</math> months</p> <p>Receiving ICS + LABA for <math>\geq 3</math> month and at a stable medium or high dose of ICS for at least 1 month</p> <p>Prebronchodilator FEV1 &lt; 80 % predicted</p> <p>Change in FEV1 of <math>\geq 12</math> % and 200 mL after salbutamol or albuterol</p> | <p>Smoked or inhaled tobacco products within the 6-month period prior</p> <p>Asthma exacerbation requiring systemic steroids or hospitalization or ED visit within 6 weeks</p> <p>Narrow-angle glaucoma</p> <p>Symptomatic benign prostatic hyperplasia (BPH)</p> <p>Bladder-neck obstruction</p> <p>Severe renal impairment or urinary retention</p> <p>Respiratory tract infection or asthma worsening within 4 weeks prior</p> <p>Any chronic conditions affecting the upper respiratory tract or chronic lung disease other than asthma</p> <p>Type I diabetes or uncontrolled Type II diabetes</p> <p>Clinically significant ECG abnormality</p> <p>History of hypersensitivity or intolerance to any of the study drugs</p> <p>Narcolepsy and/or insomnia</p> <p>Maintenance Immunotherapy (desensitization) for allergies for less than 3 months</p> <p>Maintenance Immunotherapy for more than 3 months prior, expected to change throughout the course of the study</p> <p>Pregnant or nursing (lactating) women</p> <p>Women of child-bearing potential not using highly effective contraception</p> <p>Having discontinued LAMA therapy in the past for any safety, tolerability or perceived lack of efficacy reason</p> <p>Paradoxical bronchospasm in response to inhaled medicines</p> <p>Clinically relevant bronchoconstriction with forced expiratory maneuvers</p> <p>Potassium level below the laboratory limit of normal</p> |
| Zhang, 2018      | <p>Aged &gt;18 years</p> <p>Asthma</p> <p>Pre-bronchodilator FEV1 &lt; 60% predicted</p>                                                                                                                                                                                                                                                                                     | <p>Critical disease other than asthma</p> <p>Pregnant or lactating women</p> <p>Use of receptor antagonists</p> <p>Lung diseases in addition to asthma or pulmonary lobectomy</p> <p>Contraindications to salmeterol or tiotropium bromide</p>                                                                                                                                                                                                                                                                                                                                                                                                                                                                                                                                                                                                                                                                                                                                                                                                                                                                                                                                                                                                                                                                                                                                                                                                    |

**eTable 3. Subgroup and Sensitivity Analyses**

|                                                 | Severe exacerbations   | FEV1                    | Asthma Control Score       | Asthma-related Quality of Life |
|-------------------------------------------------|------------------------|-------------------------|----------------------------|--------------------------------|
| <b>Subgroup analyses</b>                        |                        |                         |                            |                                |
| <b>Risk of Bias subgroup analysis</b>           |                        |                         |                            |                                |
| High                                            | N/A                    | MD 0.09 (0.04 to 0.14)  | SMD 0.09 (-0.40 to 0.59)   | SMD 0.31 (-0.20 to 0.83)       |
| Low                                             | RR 0.83 (0.77 to 0.90) | MD 0.08 (0.07 to 0.10)  | SMD -0.07 (-0.10 to -0.03) | SMD 0.05 (-0.03 to 0.13)       |
| Interaction                                     | N/A                    | 0.80                    | 0.53                       | 0.32                           |
| <b>Previous exacerbations subgroup analysis</b> |                        |                         |                            |                                |
| <1 exacerbation in the previous year            | RR 0.65 (0.29 to 1.47) | MD 0.08 (0.06 to 0.10)  | SMD -0.05 (-0.10 to 0.00)  | SMD 0.07 (-0.07 to 0.20)       |
| ≥1 exacerbation in the previous year            | RR 0.84 (0.77 to 0.91) | MD 0.08 (0.06 to 0.10)  | SMD -0.08 (-0.13 to -0.02) | SMD 0.05 (-0.06 to 0.16)       |
| Interaction                                     | 0.52                   | 0.88                    | 0.55                       | 0.83                           |
| <b>Type-2 asthma status subgroup analysis</b>   |                        |                         |                            |                                |
| T2 <sub>Low</sub>                               | 0.85 (0.76 to 0.95)    | MD 0.09 (0.06 to 0.12)  | N/A                        | N/A                            |
| T2 <sub>High</sub>                              | 0.86 (0.74 to 1.01)    | MD 0.08 (0.01 to 0.09)  |                            |                                |
| Interaction                                     | 0.88                   | 0.09                    |                            |                                |
| <b>Types of LAMA subgroup analysis</b>          |                        |                         |                            |                                |
| Tiotropium                                      | RR 0.82 (0.68 to 1.00) | MD 0.08 (0.06 to 0.11)  | SMD -0.04 (-0.16 to 0.08)  | SMD 0.14 (0.02 to 0.27)        |
| Glycopyrronium                                  | RR 0.82 (0.75 to 0.89) | MD 0.07 (0.04 to 0.10)  | SMD -0.05 (-0.10 to 0.00)  | SMD -0.00 (-0.07 to 0.07)      |
| Umeclidinium                                    | RR 0.93 (0.72 to 1.21) | MD 0.08 (0.07 to 0.09)  | SMD -0.10 (-0.17 – 0.04)   | N/A                            |
| Interaction                                     | 0.65                   | 0.52                    | 0.42                       | 0.05                           |
| Credibility                                     | N/A                    |                         |                            | Low                            |
| <b>Age subgroup analysis</b>                    |                        |                         |                            |                                |
| Age <18                                         | RR 0.72 (0.31 to 1.66) | MD 0.06 (-0.01 to 0.12) | SMD 0.08 (-0.06 to 0.23)   | NA                             |
| Age ≥18 *                                       | RR 0.83 (0.76 to 0.91) | MD 0.08 (0.07 to 0.10)  | SMD -0.08 (-0.12 to -0.04) |                                |
| Interaction                                     | 0.72                   | 0.48                    | 0.04                       |                                |
| Credibility                                     | N/A                    | N/A                     | Low                        | N/A                            |
| <b>FEV1 subgroup analysis</b>                   |                        |                         |                            |                                |
| FEV1 ≥ 80%                                      | RR 0.91 (0.72 to 1.15) | MD 0.06 (0.00 to 0.11)  | SMD -0.09 (-0.16 to 0.03)  | N/A                            |
| FEV1 <80%                                       | RR 0.80 (0.74 to 0.87) | MD 0.09 (0.07 to 0.10)  | SMD -0.06 (-0.11 to 0.01)  |                                |
| Not reported                                    | N/A                    | MD 0.03 (-0.03 to 0.09) | SMD -0.01 (-0.13 to 0.11)  |                                |
| Interaction                                     | 0.42                   | 0.17                    | 0.46                       |                                |



|                                                                                                                                                                     | Severe exacerbations   | FEV1                    | Asthma Control Score       | Asthma-related Quality of Life |
|---------------------------------------------------------------------------------------------------------------------------------------------------------------------|------------------------|-------------------------|----------------------------|--------------------------------|
| <b>Smoking history subgroup analysis</b>                                                                                                                            |                        |                         |                            |                                |
| Non-smoker (No current smoker included & minimal (<20%) prior smokers included)                                                                                     | RR 0.84 (0.73 to 0.97) | MD 0.08 (0.07 to 0.10)  | SMD -0.07 (-0.11 to -0.03) | N/A                            |
| Smoking history (≥20% prior smokers included)                                                                                                                       | RR 0.85 (0.77 to 0.91) | MD 0.08 (0.05 to 0.11)  | SMD 0.07 (-0.39 to 0.53)   |                                |
| Not reported                                                                                                                                                        | N/A                    | MD 0.04 (-0.03 to 0.11) | SMD 0.10 (-0.31 to 0.52)   |                                |
| Interaction                                                                                                                                                         | 0.92                   | 0.47                    | 0.61                       |                                |
| <b>Dose of ICS subgroup analysis</b>                                                                                                                                |                        |                         |                            |                                |
| Medium and High                                                                                                                                                     | RR 0.83 (0.77 to 0.95) | MD 0.08 (0.05 to 0.11)  | SMD -0.04 (-0.16 to 0.07)  | SMD 0.07 (-0.03 to 0.16)       |
| Medium only                                                                                                                                                         | RR 0.79 (0.72 to 0.87) | MD 0.08 (0.06 to 0.10)  | SMD -0.04 (-0.09 to 0.02)  | SMD 0.06 (-0.14 to 0.25)       |
| High only                                                                                                                                                           | RR 1.06 (0.87 to 1.30) | MD 0.13 (-0.06 to 0.32) | SMD 0.08 (-0.26 to 0.42)   | N/A                            |
| Interaction                                                                                                                                                         | 0.03                   | 0.86                    | 0.80                       | 0.94                           |
| Credibility                                                                                                                                                         | Low                    | N/A                     |                            |                                |
| <b>Types of ICS subgroup analysis</b>                                                                                                                               |                        |                         |                            |                                |
| Budesonide                                                                                                                                                          | RR 0.83 (0.68 to 1.00) | MD 0.09 (0.06 to 0.12)  | SMD -0.04 (-0.14 to 0.06)  | SMD 0.15 (0.04 to 0.26)        |
| Fluticasone                                                                                                                                                         | RR 0.93 (0.72 to 1.21) | MD 0.08 (0.06 to 0.09)  | SMD -0.12 (-0.18 to 0.06)  | N/A                            |
| Beclomethasone                                                                                                                                                      | RR 0.75 (0.67 to 0.85) | MD 0.06 (0.03 to 0.09)  | SMD -0.06 (-0.13 to 0.02)  |                                |
| Mometasone                                                                                                                                                          | RR 0.92 (0.80 to 1.05) | MD 0.09 (0.05 to 0.13)  | SMD -0.02 (-0.13 to 0.10)  | SMD -0.01 (-0.10 to 0.09)      |
| Interaction                                                                                                                                                         | 0.15                   | 0.75                    | 0.26                       | 0.10                           |
| * NCT03358147, 2017 considered as age ≥18 as median age was 47.7                                                                                                    |                        |                         |                            |                                |
| <b>Sensitivity analyses</b>                                                                                                                                         |                        |                         |                            |                                |
| Worse case scenario                                                                                                                                                 | RR 0.83 (0.74 to 0.92) | N/A                     |                            |                                |
| Exclude unpublished studies                                                                                                                                         | N/A                    | MD 0.08 (0.06 to 0.10)  | SMD -0.05 (-0.09 to -0.01) | SMD 0.06 (-0.03 to 0.14)       |
| Exclude high risk of bias (Approach 1: Cochrane RoB 2)                                                                                                              | N/A                    | MD 0.08 (0.07 to 0.10)  | SMD -0.07 (-0.10 to -0.03) | SMD 0.05 (-0.03 to 0.13)       |
| Exclude high risk of bias (Approach 2: Dechartes et. al. with the focus on the randomization process [sequence generation and allocation concealment] and blinding) | N/A                    | MD 0.08 (0.07 to 0.10)  | SMD -0.07 (-0.10 to -0.03) | SMD 0.05 (-0.03 to 0.13)       |

| Sensitivity analyses                                                                                                                                                       |                                           |                                           |                            |                                             |
|----------------------------------------------------------------------------------------------------------------------------------------------------------------------------|-------------------------------------------|-------------------------------------------|----------------------------|---------------------------------------------|
|                                                                                                                                                                            | Severe exacerbations                      | FEV1                                      | Asthma Control Score       | Asthma-related Quality of Life              |
| Fixed effect analyses                                                                                                                                                      | RR 0.82 (0.75 to 0.89)                    | MD 0.08 (0.06 to 0.09)                    | SMD -0.05 (-0.09 to -0.01) | SMD 0.04 (-0.02 to 0.09)                    |
| Exclude crossover trials                                                                                                                                                   | N/A                                       | MD 0.08 (0.06 to 0.10)                    | SMD -0.05 (-0.09 to -0.01) | SMD 0.05 (-0.05 to 0.15)                    |
| Exclude asthma-COPD overlap trials                                                                                                                                         | N/A                                       | N/A                                       | SMD -0.05 (-0.09 to -0.01) | N/A                                         |
| Hartung-Knapp-Sidik-Jonkman random effects                                                                                                                                 | RR 0.83 (0.76 to 0.91)                    | MD 0.08 (0.07-0.09)                       | SMD -0.05 (-0.09 to -0.01) | SMD 0.05 (-0.05 to 0.15)                    |
| Correlation coefficient of 0.5                                                                                                                                             | N/A                                       | MD 0.08 (0.06 to 0.09)                    | SMD -0.05 (-0.09 to -0.01) | SMD 0.02 (-0.03 to 0.07)                    |
| Correlation coefficient of 0.7                                                                                                                                             | N/A                                       | MD 0.07 (0.05 to 0.08)                    | SMD -0.05 (-0.09 to -0.01) | SMD 0.09 (-0.02 to 0.20)                    |
| Excluding estimated value for CAPTAIN 2020                                                                                                                                 | RR 0.80 (0.74 to 0.87)                    | N/A                                       | N/A                        | N/A                                         |
|                                                                                                                                                                            | <b>Mortality</b>                          | <b>Cardiac serious adverse events</b>     |                            |                                             |
| Accounting for no events in both groups using Bayesian meta-analysis (non-informative effect priors, Turner priors for heterogeneity),                                     | 1.03 (95% Credible Interval 0.35 to 2.47) | 0.78 (95% Credible Interval 0.40 to 1.34) | N/A                        | N/A                                         |
| Accounting for no events in both groups using Bayesian meta-analysis (non-informative effect priors, Turner priors for heterogeneity) only studies with 24-52 wk follow up | 0.96 (95% Credible Interval 0.24 to 2.63) | N/A                                       | N/A                        | N/A                                         |
| Frequentist risk difference                                                                                                                                                | 0.02% (95%CI -0.16% to 0.21%)             | 0.006% (95%CI -0.2% to 0.2%)              | N/A                        | N/A                                         |
| <b>Additional analyses, RR</b>                                                                                                                                             | <b>Dysphonia/Dry mouth</b>                | <b>SAE</b>                                | <b>Non-serious AE</b>      | <b>Treatment related AE</b>                 |
| Low risk of bias only                                                                                                                                                      | 1.66 (1.15-2.41)                          | 0.92 (0.73-1.16)                          | 0.89 (0.81-0.97)           | 1.13 (0.95-1.34)                            |
| Published only                                                                                                                                                             | 1.66 (1.15-2.40)                          | 0.90 (0.70-1.17)                          | 0.87 (0.80-0.95)           | 1.13 (0.95-1.34)                            |
|                                                                                                                                                                            | <b>Serious pulmonary infection</b>        | <b>Non-serious pulmonary infection</b>    | <b>Eye-related AE, RD</b>  | <b>Nonserious cardiac adverse event, RD</b> |
| Low risk of bias only                                                                                                                                                      | 0.87 (0.50-1.50)                          | 0.96 (0.83-1.12)                          | -0.01% (-0.21%, 0.01%)     | 0.01% (-0.27%, 0.29%)                       |
| Published only                                                                                                                                                             | 0.83 (0.47-1.46)                          | 0.97 (0.84-1.12)                          | -0.01% (-0.21%, 0.01%)     | 0.01% (-0.27%, 0.29%)                       |
|                                                                                                                                                                            | <b>Serious cardiovascular AE, RD</b>      | <b>Serious cardiovascular AE, RR</b>      | <b>Mortality, RD</b>       | <b>Mortality, RR</b>                        |
| Low risk of bias only                                                                                                                                                      | 0.006% (-0.2%, 0.2%)                      | 0.77 (0.38-1.55)                          | 0.02% (-0.02%, 0.02%)      | 0.96 (0.33-2.75)                            |
| Published only                                                                                                                                                             | -0.04% (-0.3%, 0.2%)                      | 0.75 (0.33-1.72)                          | 0.02% (-0.02%, 0.02%)      | 0.96 (0.33-2.75)                            |

Considering Zhang 2018 (n=80), according to an alternate risk of bias approach, as high risk of bias did not change any of the estimates for outcomes it reported (FEV1, non-serious AE, dysphonia/dry mouth, cardiovascular AE)

eFigure 1 Assessment of Risk of Bias using Cochrane Collaboration Tool

**Risk of bias domain**

|                   | Bias due to randomization | Bias due to deviations from intended intervention | Bias due to missing data | Bias due to outcome measurement | Bias due to selection of reported result | Overall Bias |
|-------------------|---------------------------|---------------------------------------------------|--------------------------|---------------------------------|------------------------------------------|--------------|
| Hamelmann, 2017   |                           |                                                   |                          |                                 |                                          |              |
| Hoshino, 2018     |                           |                                                   |                          |                                 |                                          |              |
| Ishiura, 2019     |                           |                                                   |                          |                                 |                                          |              |
| Ishiura, 2020     |                           |                                                   |                          |                                 |                                          |              |
| Kerstjens, 2011   |                           |                                                   |                          |                                 |                                          |              |
| Kerstjens, 2012   |                           |                                                   |                          |                                 |                                          |              |
| Kerstjens, 2020   |                           |                                                   |                          |                                 |                                          |              |
| Jabbal, 2014      |                           |                                                   |                          |                                 |                                          |              |
| Jabbal, 2020      |                           |                                                   |                          |                                 |                                          |              |
| Lee, 2020         |                           |                                                   |                          |                                 |                                          |              |
| NCT03358147, 2017 |                           |                                                   |                          |                                 |                                          |              |
| Ohta, 2015        |                           |                                                   |                          |                                 |                                          |              |
| Singh, 2014       |                           |                                                   |                          |                                 |                                          |              |
| Szefler, 2017     |                           |                                                   |                          |                                 |                                          |              |
| Virchow, 2019     |                           |                                                   |                          |                                 |                                          |              |
| Wang, 2015        |                           |                                                   |                          |                                 |                                          |              |
| Watz, 2020        |                           |                                                   |                          |                                 |                                          |              |
| Zhang, 2018       |                           |                                                   |                          |                                 |                                          |              |

Study

**Risk of bias :** Low Some concerns/Low Some concerns High Some concerns/High

**eFigure 2. Funnel plots**

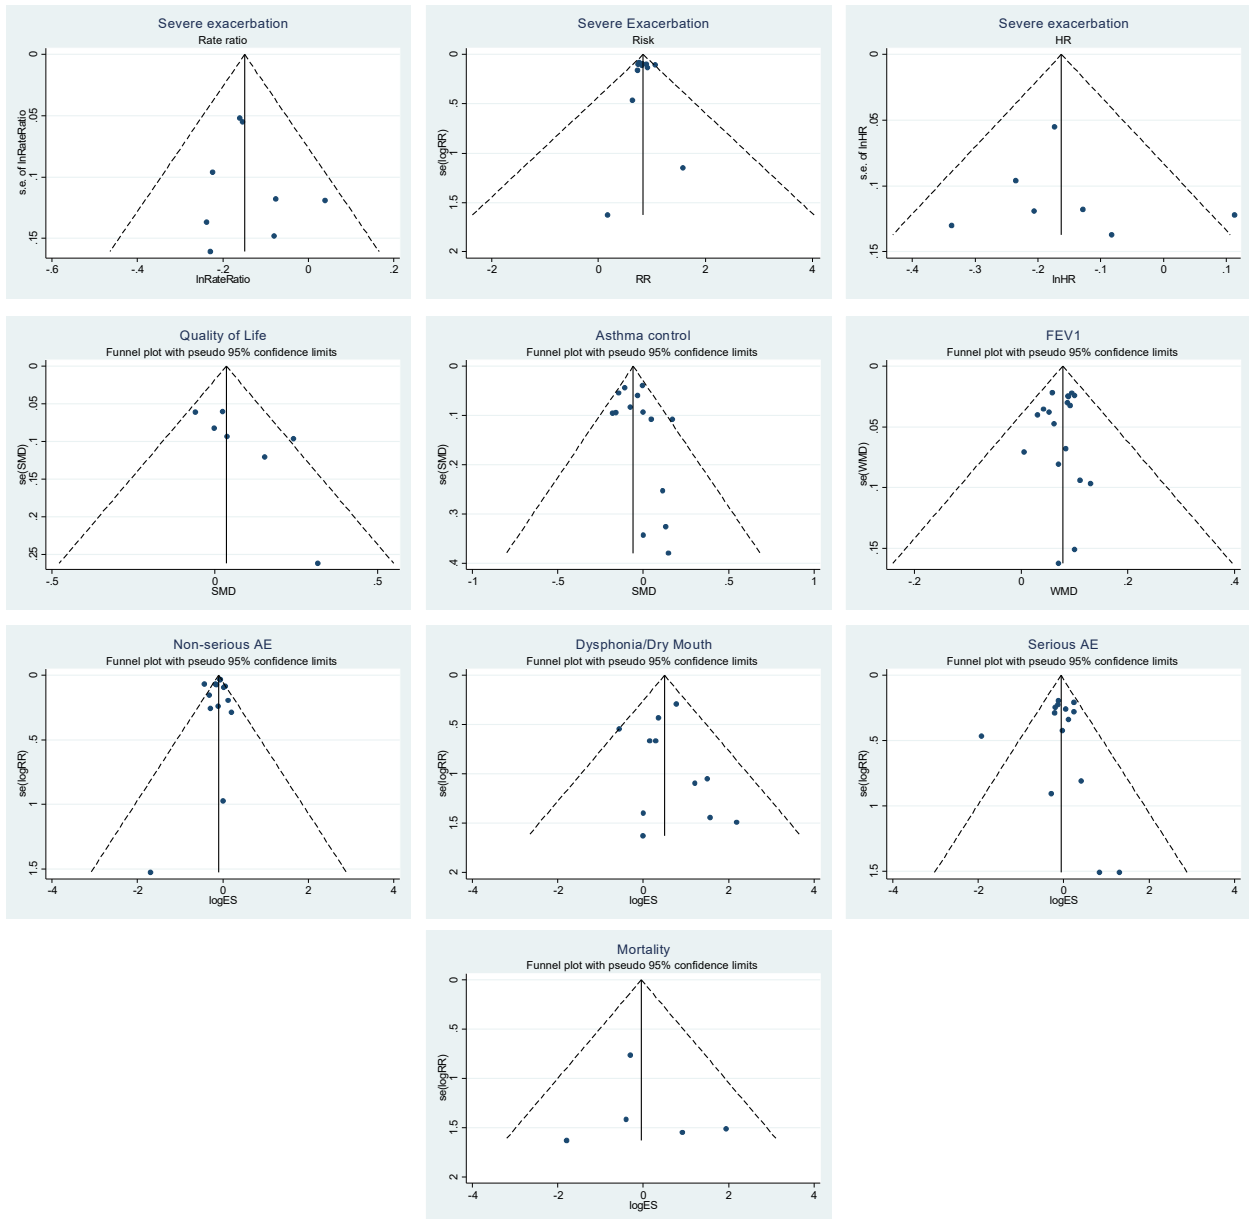

**eFigure 3. Pooled Reported Hazard Ratios**

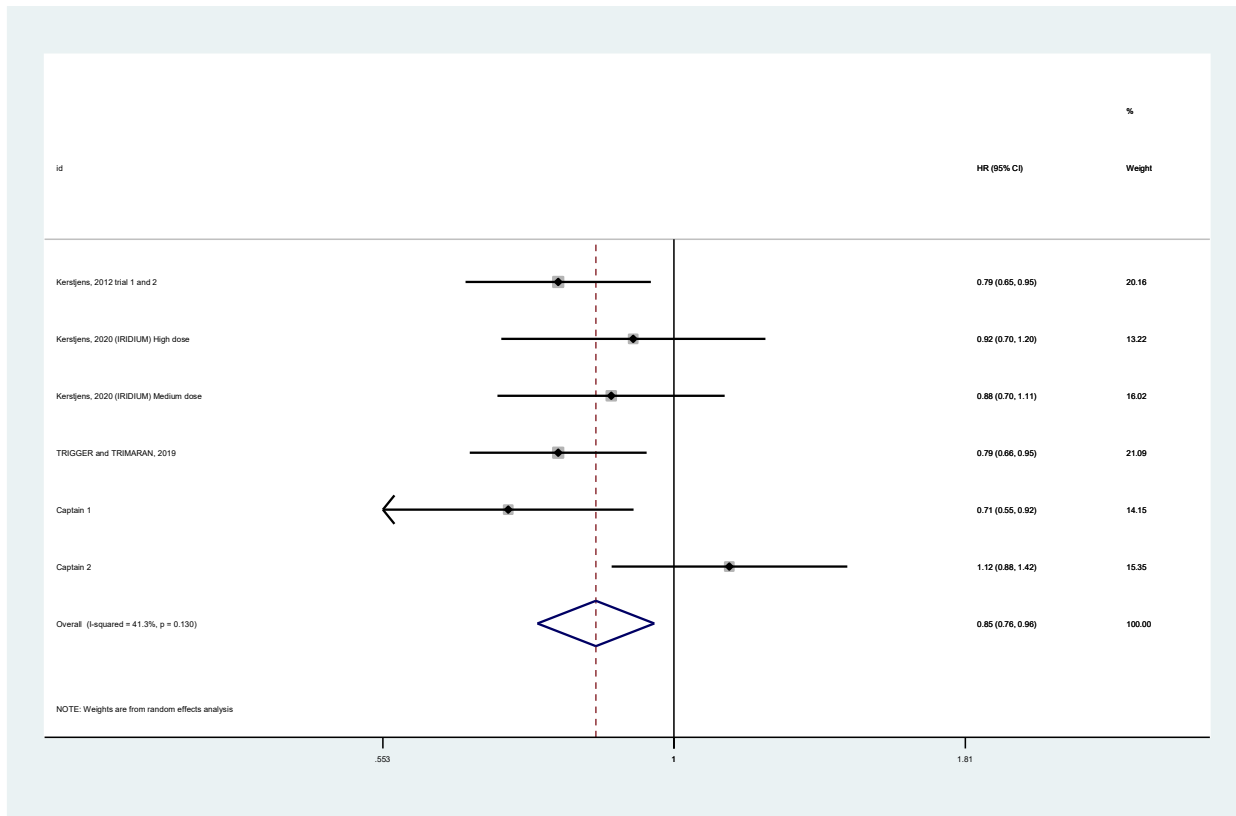

**eFigure 4. Asthma Worsening**

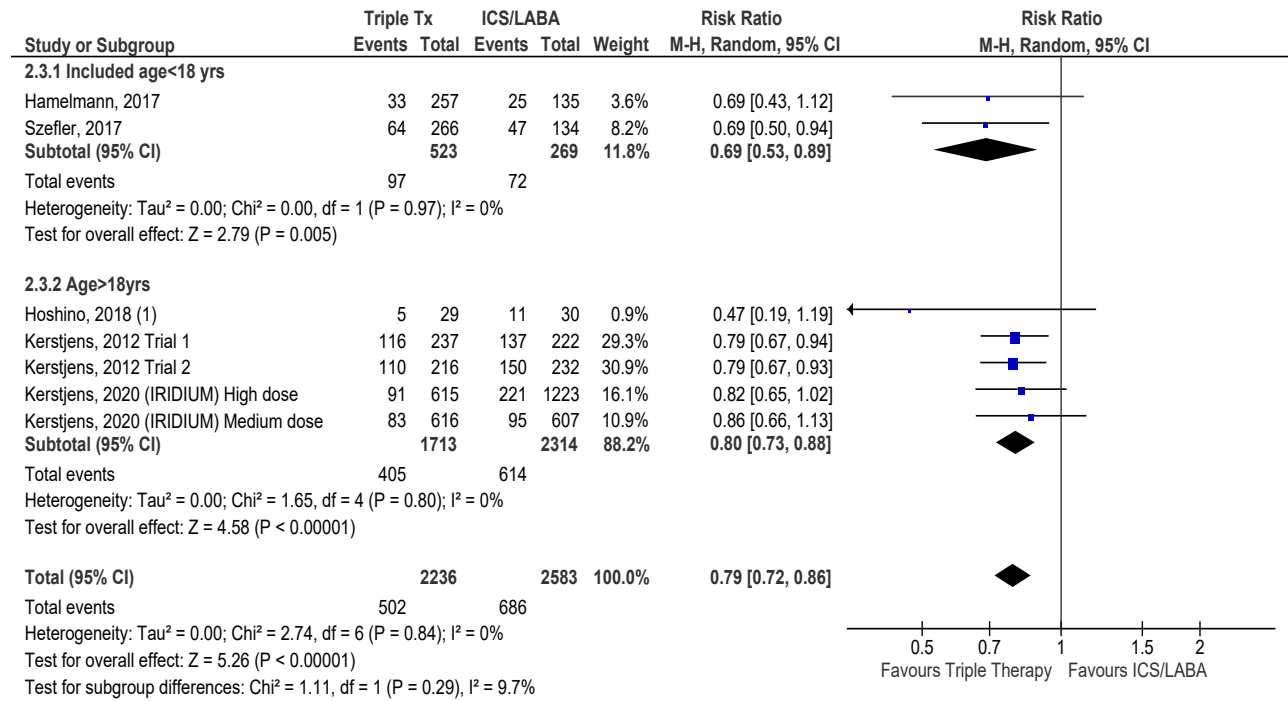

Footnotes

(1) High risk of bias

**eFigure 5. Serious and Non-Serious Adverse Events**

**Serious Adverse Event**

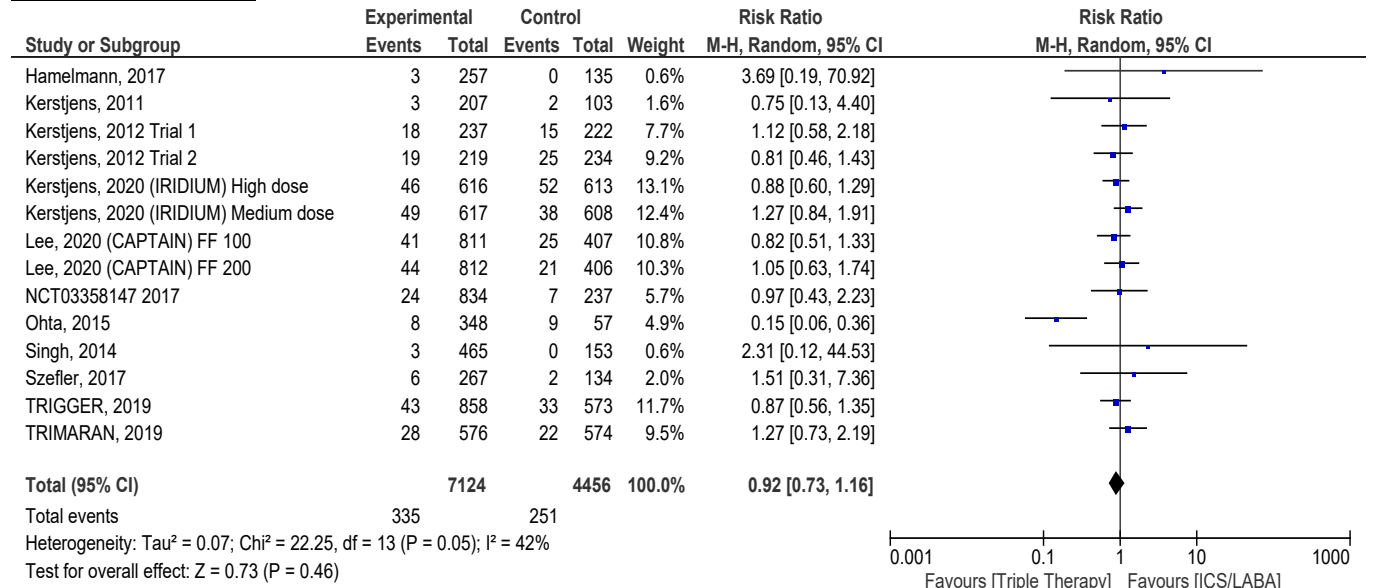

**Non-Serious Adverse Event**

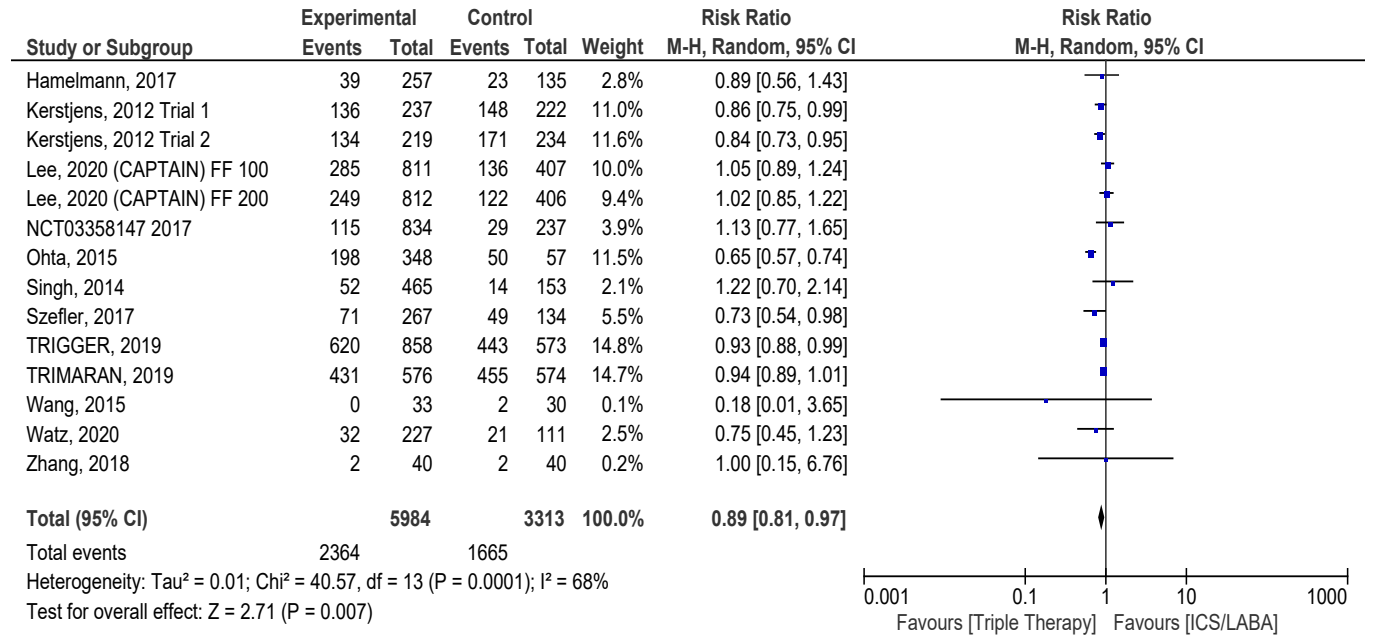

**eFigure 6. All-cause Mortality – Frequentist analysis. Risk difference (top), Relative risk (bottom)**

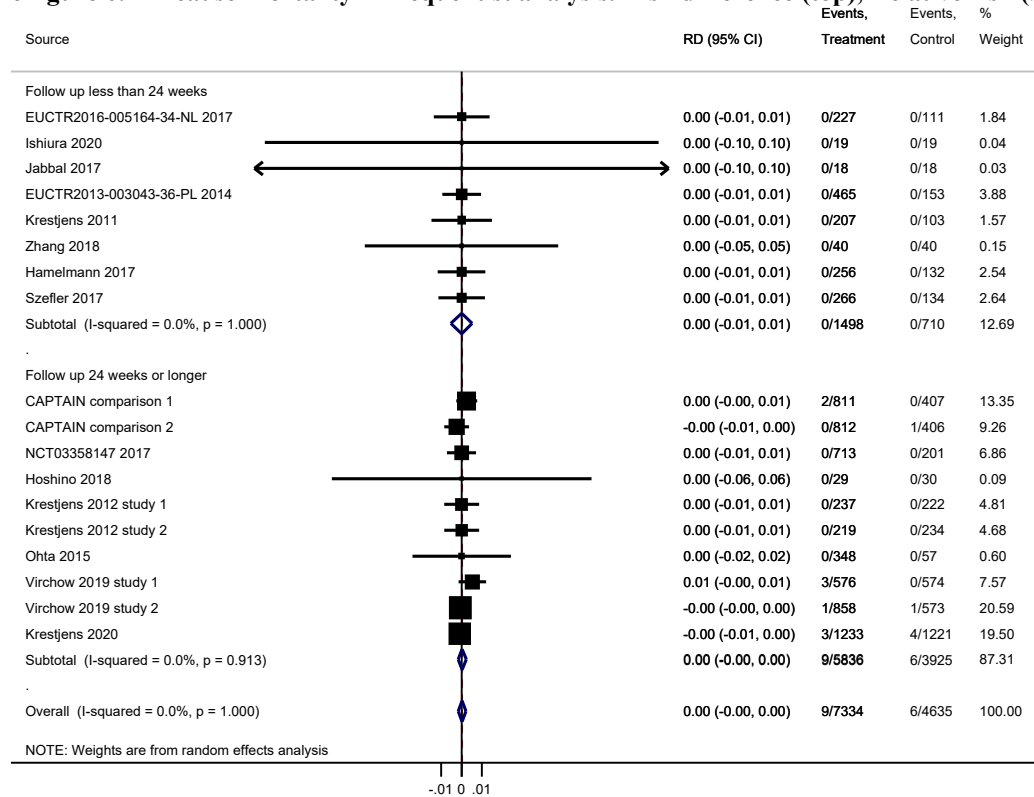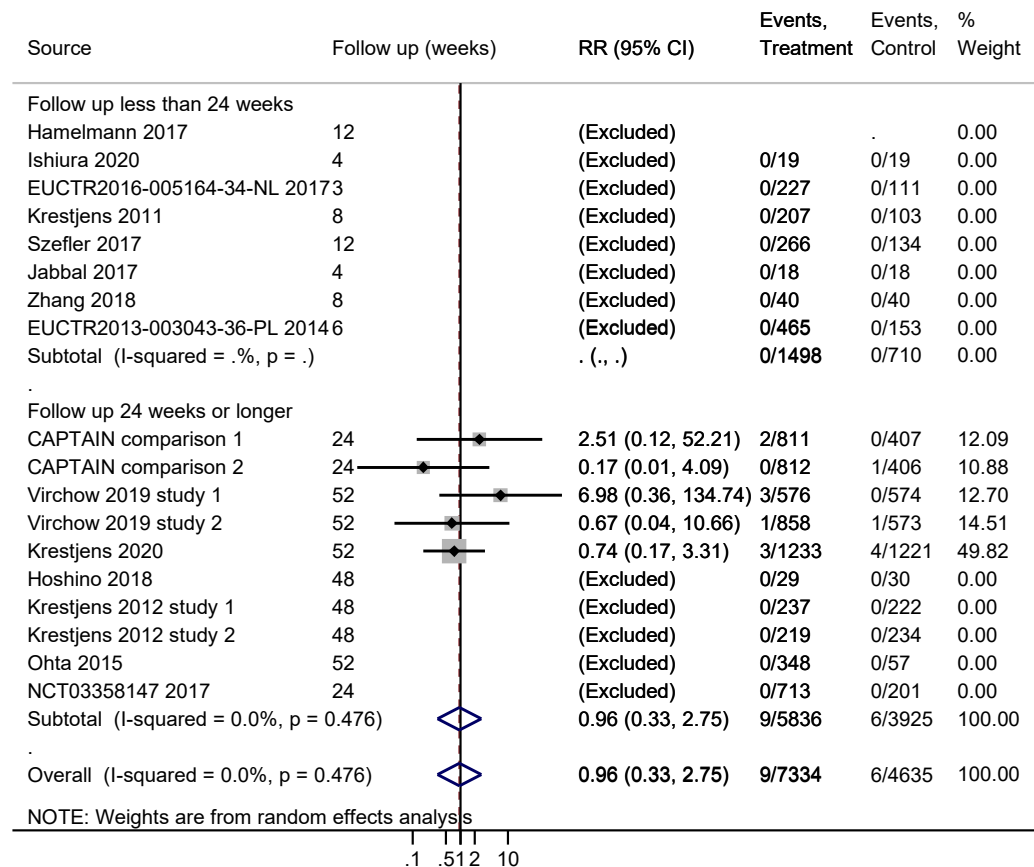



eFigure 7. Breakdown of Adverse Events

**Treatment-Related Adverse Events**

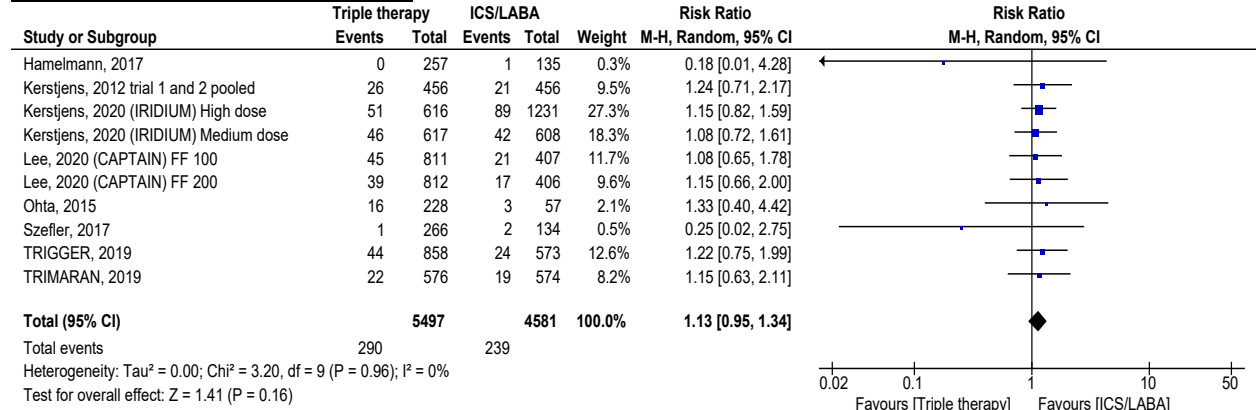

**Serious Eye-Related Adverse Events**

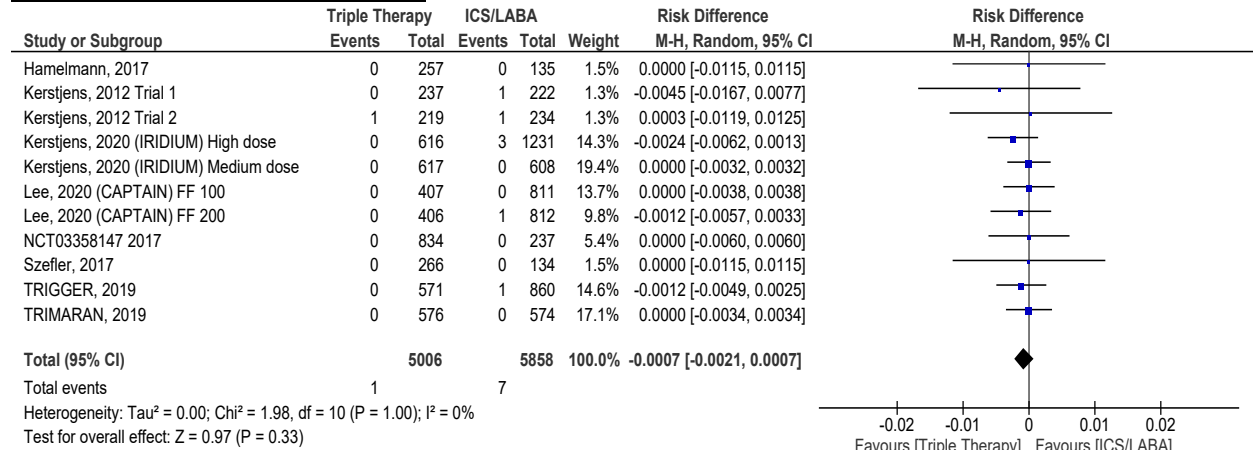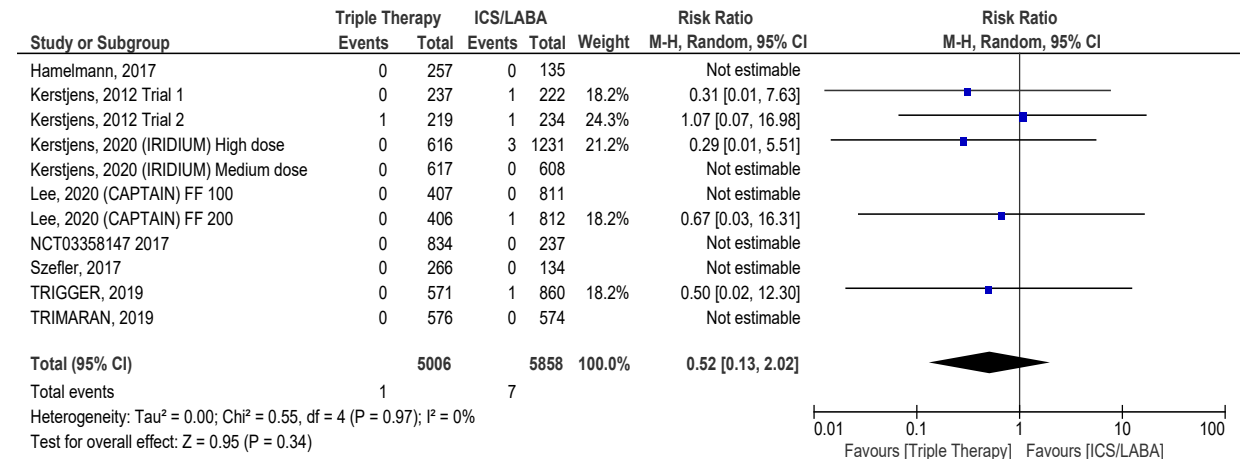

**Serious Cardiovascular Adverse Events (eg. Arrhythmia, myocardial infarction)**

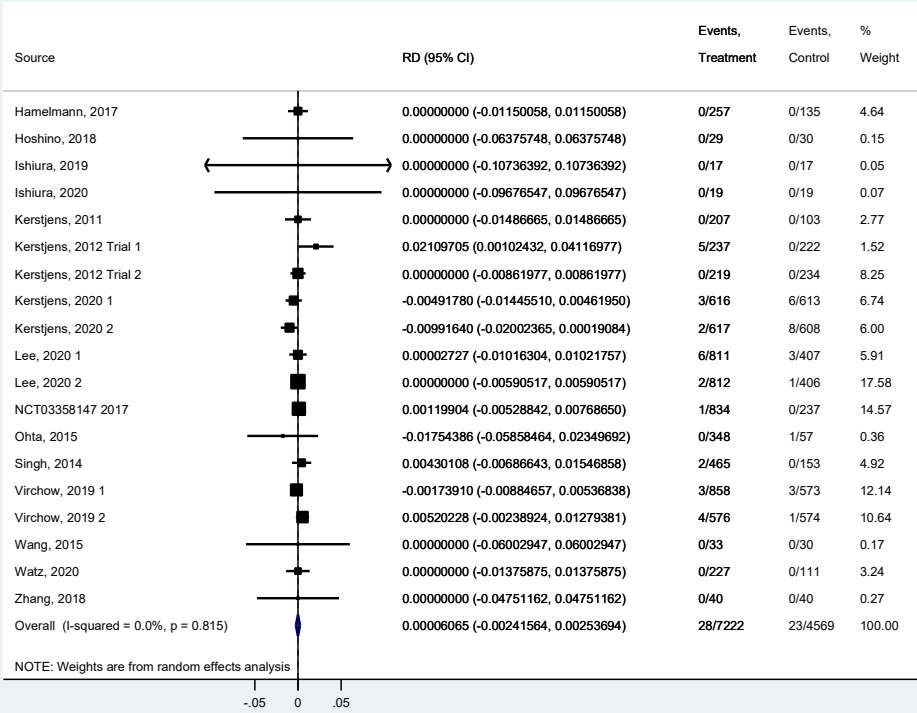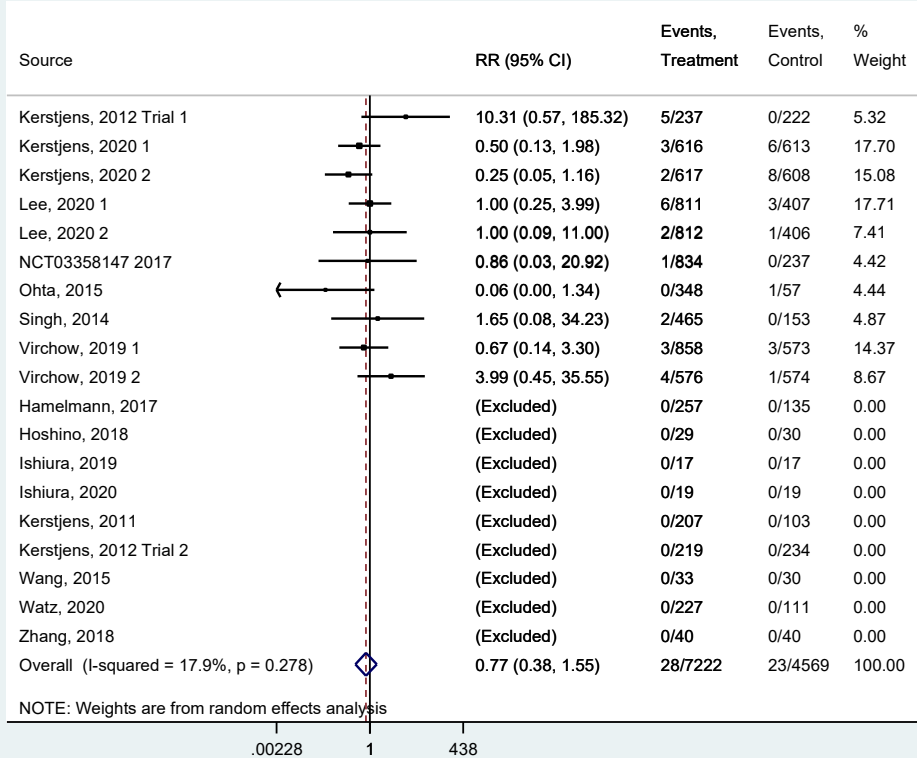

## Non-Serious Cardiac Adverse Events (eg. ECG abnormalities, Arrythmia)

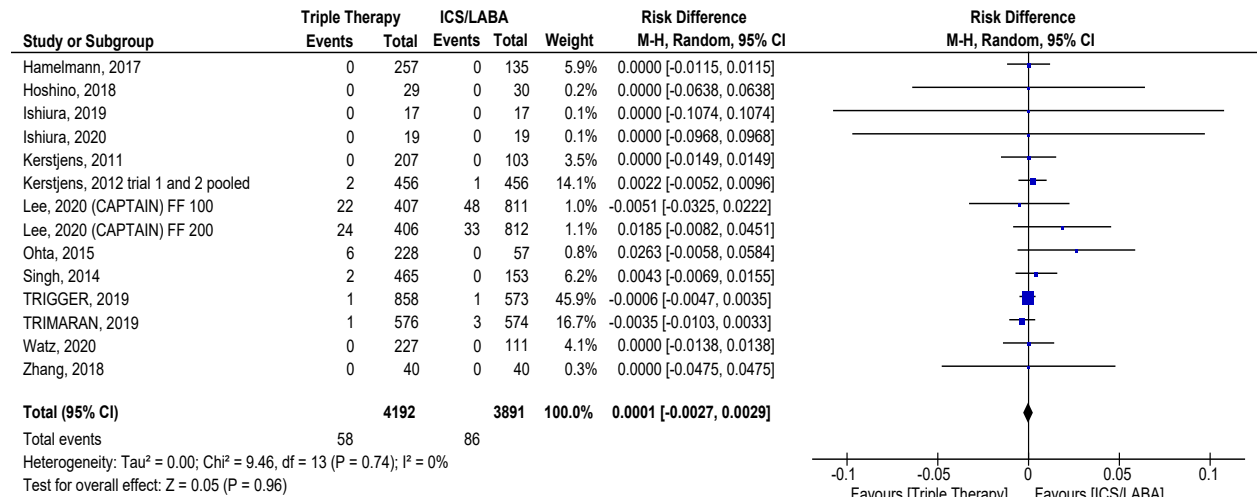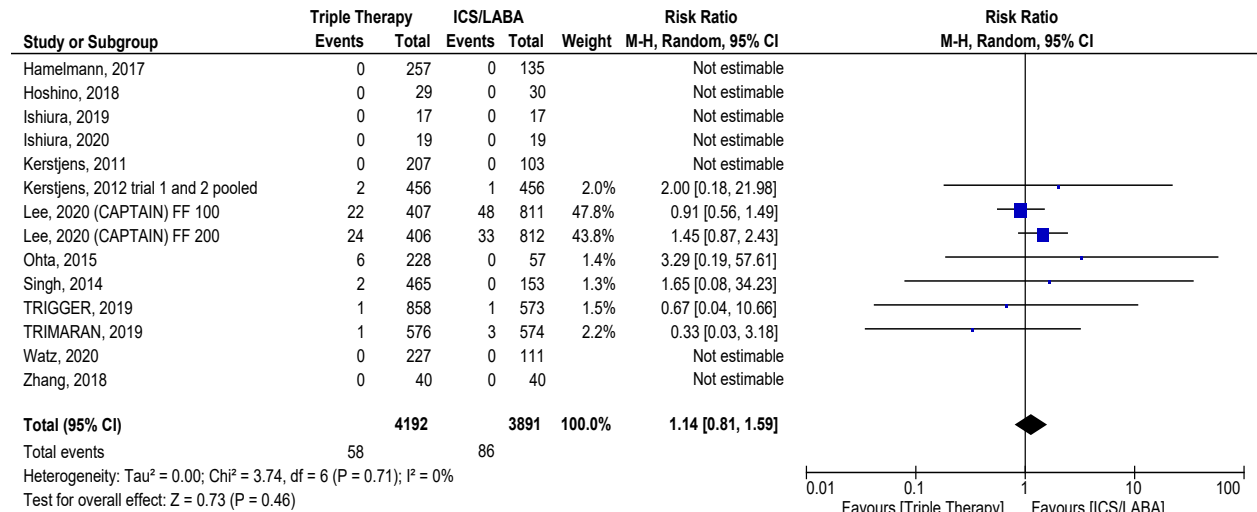

## Non-Serious Dry Mouth and Dysphonia

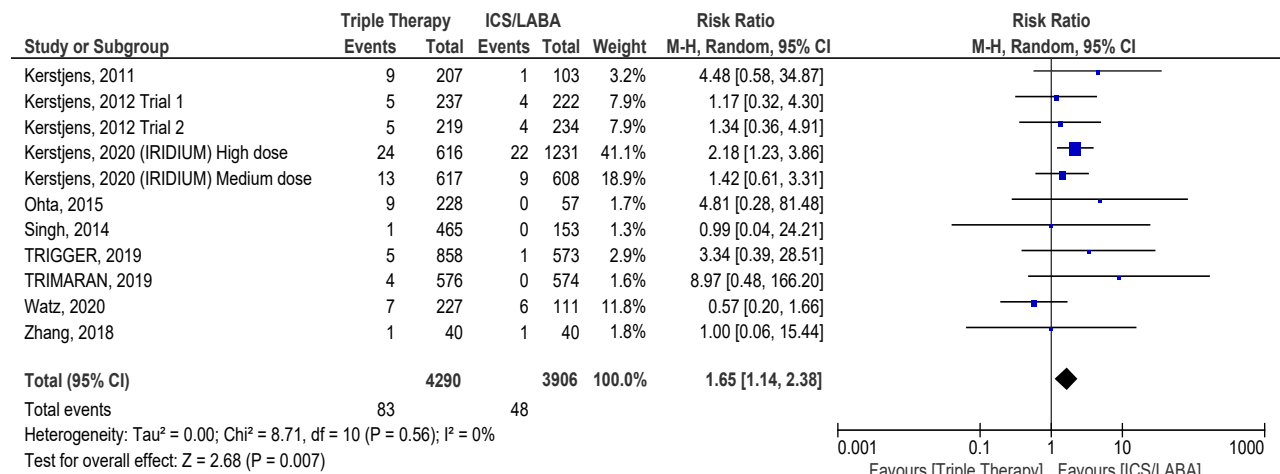

### Serious and non-serious pulmonary infectious adverse events

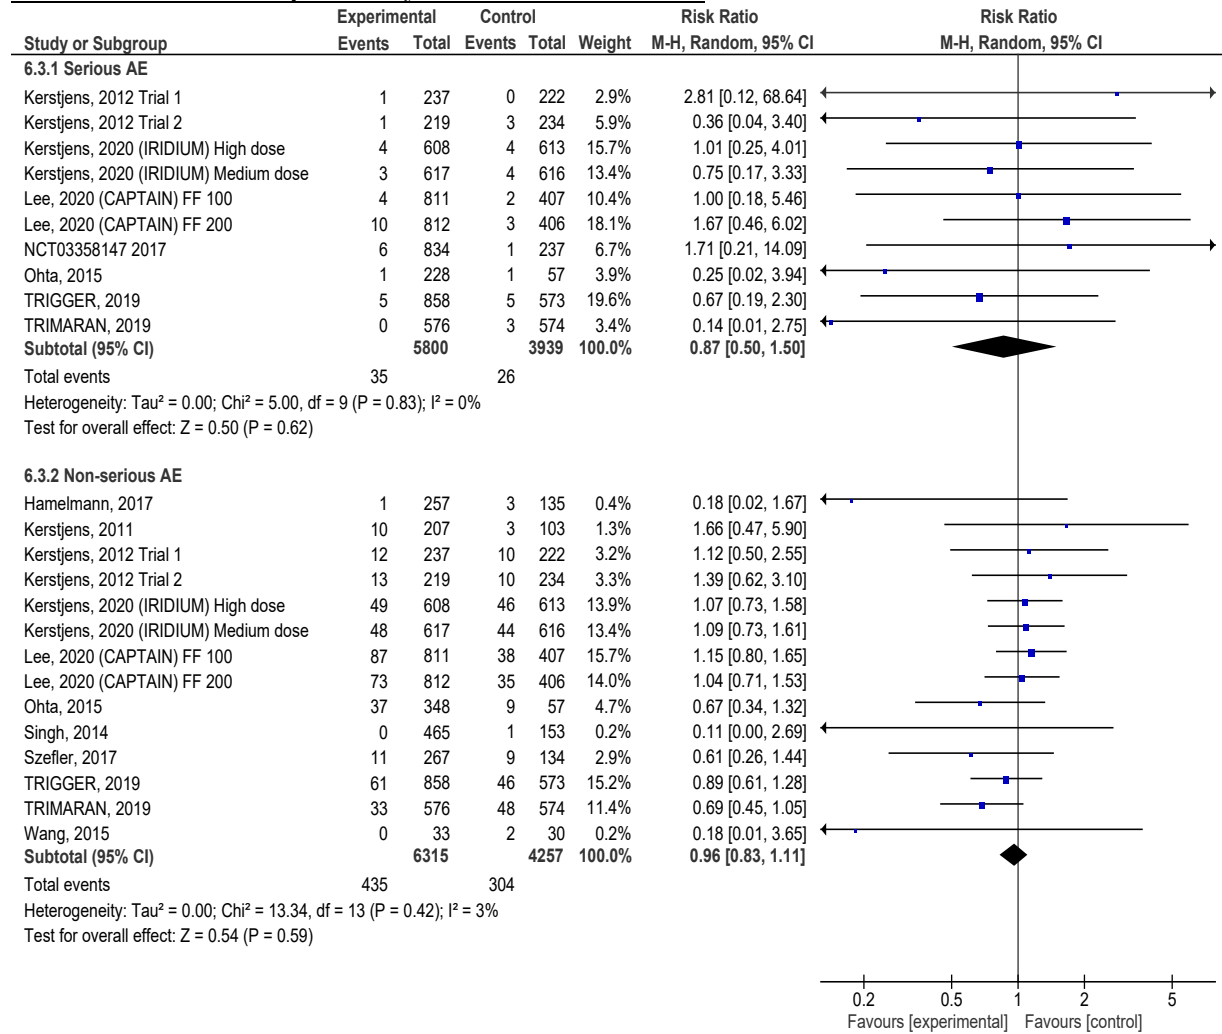

# eFigure 8. Trial Sequential Analyses

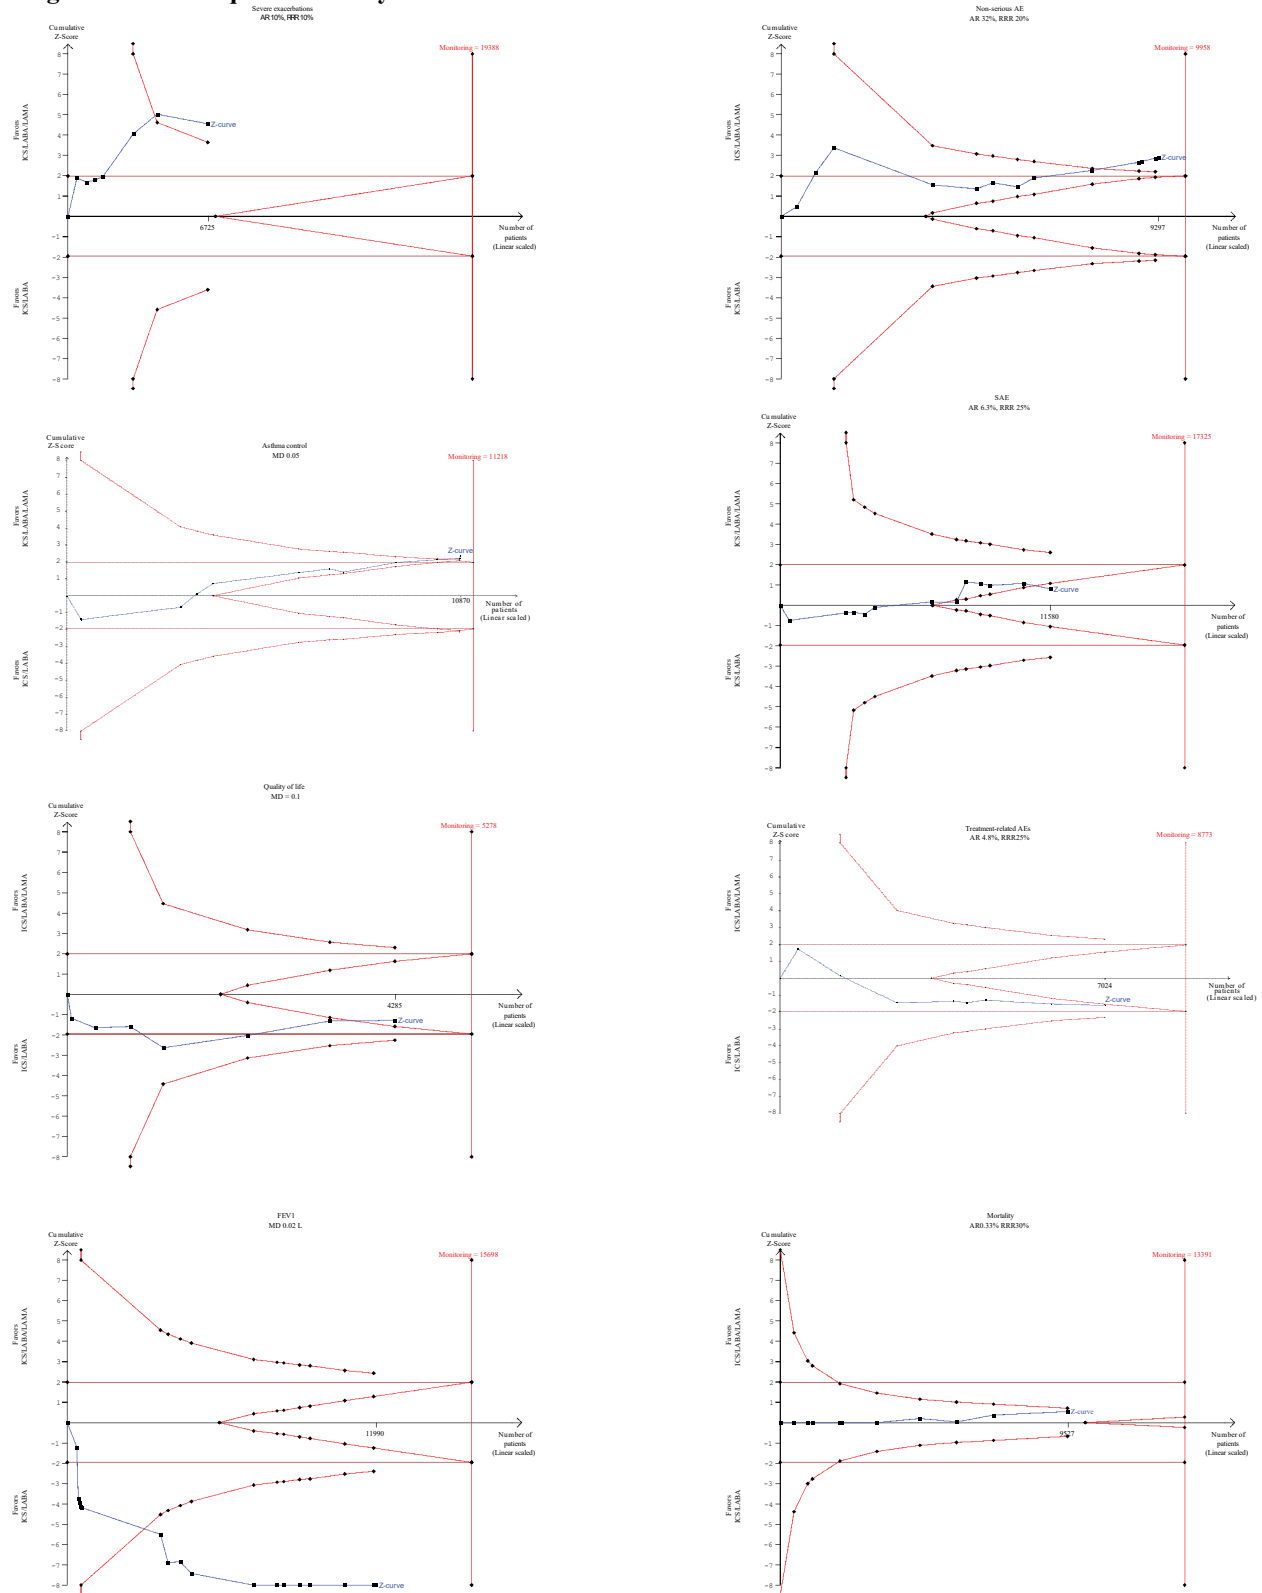

## Online-only References

1. Guyot P, Ades AE, Ouwers MJ, Welton NJ. Enhanced secondary analysis of survival data: reconstructing the data from published Kaplan-Meier survival curves. *BMC Med Res Methodol.* 2012;12:9.
2. Turner RM, Davey J, Clarke MJ, Thompson SG, Higgins JP. Predicting the extent of heterogeneity in meta-analysis, using empirical data from the Cochrane Database of Systematic Reviews. *International journal of epidemiology.* 2012;41(3):818-827.
3. Higgins JPT TJ, Chandler J, Cumpston M, Li T, Page MJ, Welch VA (editors). *Cochrane Handbook for Systematic Reviews of Interventions version 6.1.* Cochrane; 2020.
4. Guyatt GH, Thorlund K, Oxman AD, et al. GRADE guidelines: 13. Preparing summary of findings tables and evidence profiles-continuous outcomes. *J Clin Epidemiol.* 2013;66(2):173-183.
5. Lan GKK, Demets DL. Discrete sequential boundaries for clinical trials. *Biometrika.* 1983;70(3):659-663.
6. Borenstein M, Hedges L, Higgins J, Rothstein H. Chapter 19. Subgroup analyses. *Introduction to Meta-analysis.* Chichester (UK): John Wiley & Sons; 2009.
7. IntHout J, Ioannidis JPA, Borm GF. The Hartung-Knapp-Sidik-Jonkman method for random effects meta-analysis is straightforward and considerably outperforms the standard DerSimonian-Laird method. *BMC Med Res Methodol.* 2014;14:25-25.
8. Santesso N, Glenton C, Dahm P, et al. GRADE guidelines 26: informative statements to communicate the findings of systematic reviews of interventions. *Journal of Clinical Epidemiology.* 2020;119:126-135.
9. Suruki RY, Daugherty JB, Boudiaf N, Albers FC. The frequency of asthma exacerbations and healthcare utilization in patients with asthma from the UK and USA. *BMC Pulm Med.* 2017;17(1):74.
10. Juniper EF, Byrne PM, Guyatt GH, Ferrie PJ, King DR. Development and validation of a questionnaire to measure asthma control. *European Respiratory Journal.* 1999;14(4):902.
11. Nathan RA, Sorkness CA, Kosinski M, et al. Development of the asthma control test: a survey for assessing asthma control. *J Allergy Clin Immunol.* 2004;113(1):59-65.
12. Juniper EF, Guyatt GH, Epstein RS, Ferrie PJ, Jaeschke R, Hiller TK. Evaluation of impairment of health related quality of life in asthma: development of a questionnaire for use in clinical trials. *Thorax.* 1992;47(2):76.
13. Juniper EF, Guyatt GH, Cox FM, Ferrie PJ, King DR. Development and validation of the Mini Asthma Quality of Life Questionnaire. *Eur Respir J.* 1999;14(1):32-38.
